# Supplementary material for: Does acute malnutrition in young children increase the risk of treatment failure following artemisinin-based combination therapy? A WWARN individual patient data meta-analysis
Source: PubMed Central journal article supplement (PMC10951956; doi:10.1016/s2214-109x(24)00003-2), 2024-03-12
Supplement: mmc2.pdf [file mmc2.pdf]

# THE LANCET

## Global Health

### Supplementary appendix 2

This appendix formed part of the original submission and has been peer reviewed. We post it as supplied by the authors.

Supplement to: WWARN ACT Malaria and Malnutrition Study Group. Does acute malnutrition in young children increase the risk of treatment failure following artemisinin-based combination therapy? A WWARN individual patient data meta-analysis. *Lancet Glob Health* 2024; **12**: e631–40.

# Does acute malnutrition in young children increase the risk of treatment failure following artemisinin-based combination therapy: a WWARN individual patient data meta-analysis

## Supplementary Material

|                                                                                                                                                            |    |
|------------------------------------------------------------------------------------------------------------------------------------------------------------|----|
| 1. Supplementary methods.....                                                                                                                              | 2  |
| 1-1. Data Acquisition .....                                                                                                                                | 2  |
| 1-2. Variable definitions.....                                                                                                                             | 2  |
| 1-3. Definition of Endpoints.....                                                                                                                          | 2  |
| 1-4. Model building strategy .....                                                                                                                         | 3  |
| 1-5. Multiple imputations .....                                                                                                                            | 3  |
| 1-6. Risk of bias assessment.....                                                                                                                          | 4  |
| 2. Main Analysis Supplementary Tables .....                                                                                                                | 5  |
| Supplementary Table 1. Characteristics of studies included in the IPD meta-analysis.....                                                                   | 5  |
| Supplementary Table 2. Summary of treatment administered .....                                                                                             | 8  |
| Supplementary Table 3. Univariable analysis of parasite positivity on Day 2.....                                                                           | 9  |
| Supplementary Table 4. Univariable analysis of risk of recrudescence. ....                                                                                 | 10 |
| Supplementary Table 5. Univariable analysis of risk of reinfection .....                                                                                   | 12 |
| Supplementary Table 6. Prophylactic effect of treatment over 42 days of follow-up. ....                                                                    | 13 |
| Supplementary Table 7. Risk of bias assessment.....                                                                                                        | 15 |
| 3. Main Analysis Supplementary Figures .....                                                                                                               | 18 |
| Supplementary Figure 1. Distribution of children’s weight and height in individual studies. ....                                                           | 18 |
| Supplementary Figure 2. Forest plots of the association between a decrease in weight-for-height z-score and treatment outcomes in individual studies. .... | 19 |
| Supplementary Figure 3. Forest plots of the association between a decrease in height-for-weight z-score and treatment outcomes in individual studies. .... | 20 |
| Supplementary Figure 4. Map of study sites .....                                                                                                           | 21 |
| Supplementary Figure 5. Venn diagram of anthropometric measures. ....                                                                                      | 21 |
| Supplementary Figure 6. Total mg/kg dose by WHZ-score.....                                                                                                 | 22 |
| 4. Sensitivity analysis .....                                                                                                                              | 23 |
| 4-1. Assessment of study-specific data and influence of individual cohorts.....                                                                            | 23 |
| 4-2. Subgroup analysis restricted to studies using at least three molecular markers for identification of treatment outcomes .....                         | 25 |
| 4-3. Multiple imputations of age .....                                                                                                                     | 26 |
| 5. Supplementary References .....                                                                                                                          | 27 |
| 6. Members of WWARN ACT Malaria and Malnutrition Study Group .....                                                                                         | 27 |

## 1. Supplementary methods

### 1-1. Data Acquisition

Investigators of studies satisfying the inclusion criteria were invited to participate in this IPD meta-analysis. Individual study protocols were available for all trials included, either from the publication or as a metafile submitted with the raw data. Individual patient data from eligible studies were previously shared with WWARN, collated and standardised using previously described methodology.<sup>1</sup> Analysis was conducted on data extracted as of 28 September 2020. Subsequently (last check April 2021) two additional studies were available with a total of 22 children treated with ASMQ or DP. Permission to use the data were not sought due to small number of eligible patients.

### 1-2. Variable definitions

The doses of artemisinin derivatives and the partner compounds received were calculated from the number of daily tablets administered to each patient. If the daily tablet counts were not available, doses were back-calculated using the dosing scheme available from study protocols.

The study sites were classified into 3 categories of *Plasmodium falciparum* malaria transmission intensity: low, medium and high malaria based on the *Plasmodium falciparum* parasite prevalence estimates PfPR obtained from the Malaria Atlas Project for specific location and year of study (for methodology see <sup>2</sup>). Study sites with a PfPR <0.10 were classified as low, with PfPR from 0.15 to <0.40 as moderate and with PfPR ≥0.40 as high transmission areas.<sup>3</sup>

Nutritional status was assessed with standardised age, weight, height and gender specific growth reference according to the WHO 2006 recommendations using igrowup Stata package 11. Anthropometric indicators include weight-for-age (WAZ), height-for-age (HAZ), and weight-for-height (WHZ). The nutritional status of a child were given as a Z-score and classified as underweight (WAZ<-2), stunted (HAZ<-2), or wasted (WHZ<-2) as defined in the WHO guidelines.<sup>4,5</sup>

In patients with missing haemoglobin concentration, haematocrit was converted to haemoglobin using the following relationship<sup>6</sup>:

$$\text{Hematocrit (ht)} = 5 \cdot 62 + 2 \cdot 60 \times \text{Haemoglobin (hb)}$$

Anaemia was defined as severe when haemoglobin concentration was below 7g/dl and as moderate if haemoglobin concentration was between 7-10g/dL.

### 1-3. Definition of Endpoints

#### a) *Early Parasitological response*

A pre-defined algorithm was used to estimate positivity status on days 2 or 3, if no observation of the blood film was recorded on that day as described in WWARN clinical Module DMSAP <sup>1</sup>. For studies with frequent or irregular sampling, a patient was classified as being positive on days 1, 2 and 3 after enrolment if the measurements within a window of ±2 hours of 24, 48 and 72 hours were positive.

#### b) *Plasmodium falciparum recrudescence*

Recrudescence was defined as recurrence of asexual Pf parasitaemia of the same genotype(s) that caused the original illness, due to incomplete clearance of asexual parasites after antimalarial treatment.

For the analysis of *Plasmodium falciparum* recrudescence, event was defined as PCR confirmed Pf recrudescence. Patients who had a new infection (of any species) were censored at the first day the positive parasitaemia was recorded.

Patients who had a reappearance of Pf parasites but the PCR result was not available were excluded from the analysis to avoid informative censoring.

### c) *Plasmodium falciparum* re-infection

Reinfection was defined as a new Pf infection that follows a primary infection; distinguished from recrudescence by the parasite genotype, which is often (but not always) different from that which caused the initial infection.

For the analysis of *Plasmodium falciparum* re-infection, failure were defined as PCR confirmed Pf re-infection. Patients who had a new infection other than Pf species or Pf recrudescence were censored at the first day the positive parasitaemia was recorded. Patients who had a reappearance of Pf parasites but the PCR result was available were excluded from the analysis to avoid informative censoring.

### 1-4. Model building strategy

For all multivariable analyses the same approach was used. The WHZ score, age category and ACT treatment were kept in the model regardless of their statistical significance. The remaining covariates were investigated for inclusion in the model using a general strategy recommended by Collett.<sup>7</sup>

- i) All possible risk factors were examined in a univariable analysis. The log-likelihood estimates ( $-2 \times \text{Log}\hat{L}$ ) were compared against the null model to assess if any of the variables reduce its value at 5% level of statistical significance.
- ii) All the variables identified in step (i) were fitted together in one model and variables which were not significant in the presence of other variables based on the results of the Wald test were identified.
- iii) A likelihood ratio test was used to assess the impact of omitting variables identified in step (ii). If the omitted variable did not significantly impact the model log-likelihood, then they were dropped. Only variables which led to significant change in log-likelihood were retained.
- iv) All variables excluded from step (i) were added to the model identified in step (iii) one by one to check if they provided any improvement to the model.
- v) A final check of the model identified in step (iv) was carried out to ensure that none of the variables in the model could be omitted without significantly increasing the model log-likelihood, and none of the excluded variables significantly reduced the model log-likelihood.
- vi) In the final model identified in v) interaction term between ACT and WHZ was added and likelihood ratio test was used to assess the improvement to the model.

The underlying assumption of proportional hazards was tested in the final model using Schoenfeld residuals and reported when violated. For variables which violated the assumption, interaction between this variable and time intervals (0-28, 28-42 days) or (0-21, 21-28, 28-42 days) were considered for inclusion in the final model.

Fractional polynomials<sup>8</sup> were used to adjust for the nonlinear relationship with continuous variables.

Interaction terms between different ACTs and nutritional covariates were explored to assess if the malnutrition effect is different for different treatments.

### 1-5. Multiple imputations

For studies with age measured in years for all or majority of children (>50%), multiple univariable imputation for such values were conducted using an interval regression imputation method (stata command: *mi impute intreg*<sup>9</sup>), assuming for a child with recorded age of x years that their true age is between x years 0 months and x years 11 months. All variables assessed in the multivariable models: weight, height, sex, study site, anaemia, fever, log<sub>10</sub> parasitaemia, ACT, transmission intensity area were included as auxiliary variables in the imputation model.

Outcome variables: parasite positivity on day 2, recrudescence by day 42, new infection by day 42, day of outcome, cumulative hazard (Nelson-Aalen estimator) for recrudescence and for new infection were also included. Twenty datasets were imputed.

For each imputed dataset, anthropometric measures (WHZ, HAZ) were estimated using the imputed age and the final models were fitted. Model coefficients and standard errors were adjusted for the variability between imputations (stata command: *mi estimate*) according to the combination rules by Rubin.<sup>10</sup>

#### **1-6. Risk of bias assessment**

Risk of bias within studies was assessed based on: 1) study design (randomization, sequence generation, blinding); 2) accuracy in estimation of anthropometric indices and extent of the out-of-range values; and 3) the number and proportion of patients with (a) missing outcomes and (b) missing baseline covariates (age, weight, parasitaemia, temperature, haemoglobin).

In the sensitivity analysis, the final models, were refitted (a) with each study's data excluded, one at a time, and a coefficient of variation around the parameter estimates calculated; (b) in studies which used at least three molecular markers to distinguish recrudescence from the reinfection; (c) using multiple imputations for age in studies which have not provided age in months, or in which majority of children had age given as integer. Exclusion of studies would identify any influential studies, that is, studies with unusual results (due to variations in methodology, patient population, or other reasons) that affect the overall pooled analysis findings.

## 2. Main Analysis Supplementary Tables

**Supplementary Table 1. Characteristics of studies included in the IPD meta-analysis**

| Study ID | Pubmed ID                    | Study Design | Location                                                         | Year      | ACT          | Duration of FU |
|----------|------------------------------|--------------|------------------------------------------------------------------|-----------|--------------|----------------|
| 1        | 20361381; 17884832           | cohort       | Gabon                                                            | 2005      | ASMQ         | 28             |
| 2        | 21740570                     | RCT          | Cameroon, Cote d'Ivoire                                          | 2008-2009 | AL           | 28             |
| 3        | 19128455                     | RCT          | Mali                                                             | 2005      | ASAQ         | 28             |
| 4        | 27599612                     | RCT          | Democratic Republic of Congo                                     | 2013-2014 | AL, ASAQ     | 42             |
| 5        | 15837358                     | single arm   | Kenya, Nigeria, Tanzania                                         | 2002-2003 | AL           | 28             |
| 6        | UNPUBLISHED                  | RCT          | Niger                                                            | 2011      | AL, ASAQ     | 28             |
| 7        | 20689585; 17519410; 19841149 | RCT          | Uganda                                                           | 2004-2008 | AL, ASAQ     | 28             |
| 8        | 24354627                     | RCT          | Senegal                                                          | 2010-2012 | AL, ASAQ     | 42             |
| 9        | 22458860                     | RCT          | India                                                            | 2007      | ASAQ         | 28             |
| 10       | 19454000                     | single arm   | India                                                            | 2007      | AL           | 28             |
| 11       | 24825870; 19877969; 21383095 | RCT          | Uganda                                                           | 2007-2009 | AL, DP       | 28             |
| 12       | 23270636                     | RCT          | Cameroon, Cote d'Ivoire, Senegal                                 | 2007-2008 | AL, ASAQ     | 28             |
| 13       | 22087077                     | RCT          | Burkina Faso, Gabon, Mozambique, Nigeria, Rwanda, Uganda, Zambia | 2007-2008 | AL, DP       | 28             |
| 14       | UNPUBLISHED                  |              | Liberia                                                          | 2010-2011 | ASAQ         | 28             |
| 15       | 22824059                     | single arm   | Ethiopia                                                         | 2008-2009 | AL           | 42             |
| 16       | 19936217                     | RCT          | Burkina Faso, Kenya, Mozambique, Uganda, Zambia                  | 2005-2006 | AL, DP       | 42             |
| 17       | 19187521                     | single arm   | Kenya                                                            | 2007      | ASAQ         | 28             |
| 18       | 25108397                     | cohort       | Mozambique                                                       | 2011-2012 | AL, ASAQ     | 28             |
| 19       | 16903879                     | RCT          | Lao People's Democratic Republic                                 | 2004      | ASMQ, DP     | 42             |
| 20       | UNPUBLISHED                  | RCT          | Cote d' Ivoire                                                   | 2012      | AL, ASAQ     | 28             |
| 21       | 34205228                     | cohort       | Mali                                                             | 2009      | AL           | 28             |
| 22       | 21838909                     | RCT          | Senegal                                                          | 2007-2008 | AL, ASAQ     | 28             |
| 23       | 27430374                     | RCT          | Burkina Faso, Kenya, Tanzania                                    | 2010-2013 | AL, ASMQ     | 42             |
| 24       | 25436614                     | RCT          | Uganda                                                           | 2008      | AL, ASAQ     | 42             |
| 25       | 17477865                     | RCT          | Guinea                                                           | 2004      | ASAQ         | 28             |
| 26       | 27776521                     | single arm   | Mali, Niger                                                      | 2013-2015 | AL           | 42             |
| 27       | UNPUBLISHED                  | PK study     | Ghana                                                            | 2011-2012 | ASAQ         | 42             |
| 28       | 19505304                     | RCT          | Cameroon, Madagascar, Mali, Senegal                              | 2006      | AL, ASAQ     | 28             |
| 29       | 23866774                     | RCT          | Liberia                                                          | 2008-2009 | AL, ASAQ     | 42             |
| 30       | 25075834                     | RCT          | Democratic Republic of Congo                                     | 2013      | AL           | 28             |
| 31       | 20065010                     | RCT          | Senegal                                                          | 2008      | AL, ASMQ     | 28             |
| 32       | 25240962                     | single arm   | Tanzania                                                         | 2013      | AL           | 28             |
| 33       | 25001306                     | RCT          | Democratic Republic of Congo                                     | 2011-2012 | AL, ASAQ, DP | 42             |
| 34       | 27313266                     | cohort       | Thailand                                                         | 2003-2012 | ASMQ         | 42             |
| 35       | 25549086                     | RCT          | Papua New Guinea                                                 | 2010-2012 | AL           | 42             |
| 36       | 16163624                     | RCT          | Tanzania                                                         | 2002-2003 | AL, ASAQ     | 42             |

| Study ID | Malnutrition<br>Exclusion criteria                                                                                                     | N total<br>included | Age    |      |      | Underweight |       | Stunted     |       | Wasted      |       |
|----------|----------------------------------------------------------------------------------------------------------------------------------------|---------------------|--------|------|------|-------------|-------|-------------|-------|-------------|-------|
|          |                                                                                                                                        |                     | Median | Min  | Max  | N evaluated | %     | N evaluated | %     | N evaluated | %     |
| 1        | None                                                                                                                                   | 26                  | 3.00   | 1.00 | 4.00 | 26          | 0.0   | 26          | 7.7   | 26          | 3.8   |
| 2        | Severe malnutrition                                                                                                                    | 34                  | 3.00   | 2.00 | 4.00 | 33          | 3.0   | 34          | 26.5  | 28          | 3.6   |
| 3        | None                                                                                                                                   | 131                 | 3.00   | 0.50 | 4.91 | 131         | 8.4   | 131         | 13.7  | 131         | 8.4   |
| 4        | weight-for-height below -3 Z-score and/or symmetrical oedemas involving at least the feet                                              | 249                 | 2.58   | 0.50 | 4.83 | 249         | 22.9  | 247         | 44.1  | 249         | 4.4   |
| 5        | weight for height <70% of the median NCHS/WHO reference                                                                                | 270                 | 1.66   | 0.16 | 4.91 | 270         | 20.4  | 265         | 39.2  | 268         | 10.4  |
| 6        | weight-to-height ratio <-3 z-score and / or oedema                                                                                     | 81                  | 3.00   | 0.25 | 4.50 | 80          | 16.3  | 77          | 27.3  | 80          | 7.5   |
| 7        | weight-for-height or height-for-age z-score <-3                                                                                        | 107                 | 3.47   | 1.05 | 4.94 | 107         | 3.7   | 107         | 25.2  | 107         | 1.9   |
| 8        | Severe malnutrition                                                                                                                    | 11                  | 3.00   | 1.00 | 4.00 | 11          | 18.2  | 11          | 9.1   | 10          | 20.0  |
| 9        | None                                                                                                                                   | 13                  | 4.00   | 0.58 | 4.00 | 13          | 30.8  | 13          | 61.5  | 13          | 0.0   |
| 10       | None                                                                                                                                   | 3                   | 3.00   | 3.00 | 4.00 | 3           | 100.0 | 2           | 100.0 | 3           | 33.3  |
| 11       | None                                                                                                                                   | 271                 | 0.83   | 0.31 | 2.67 | 271         | 15.5  | 271         | 29.5  | 271         | 3.0   |
| 12       | weight-for-height <70% of the median NCHS/WHO reference value, with a symmetrical oedema involving the feet                            | 193                 | 3.00   | 0.91 | 4.00 | 192         | 13.5  | 190         | 24.2  | 191         | 12.6  |
| 13       | weight for height <70% of the median NCHS/WHO                                                                                          | 3,636               | 2.33   | 0.50 | 4.91 | 3636        | 22.1  | 3625        | 32.2  | 3624        | 12.9  |
| 14       | weight- for-height is below -3 Standard Deviation or <70% of the median of the NCHS/WHO reference and/or oedema                        | 102                 | 2.54   | 0.66 | 4.83 | 102         | 14.7  | 101         | 21.8  | 102         | 11.8  |
| 15       | severe malnutrition                                                                                                                    | 47                  | 3.00   | 1.00 | 4.50 | 47          | 23.4  | 46          | 28.3  | 47          | 23.4  |
| 16       | weight for height <70% of the median NCHS/WHO reference                                                                                | 1,534               | 2.30   | 0.49 | 4.98 | 1534        | 15.6  | 1522        | 41.9  | 1527        | 3.9   |
| 17       | malnutrition                                                                                                                           | 90                  | 2.58   | 0.50 | 4.91 | 90          | 4.4   | 90          | 22.2  | 89          | 4.5   |
| 18       | wfh <70% of median NCHS/WHO reference                                                                                                  | 661                 | 2.39   | 0.49 | 4.99 | 661         | 16.0  | 600         | 30.2  | 616         | 7.8   |
| 19       | malnutrition                                                                                                                           | 32                  | 3.30   | 1.00 | 4.00 | 32          | 40.6  | 32          | 43.8  | 31          | 32.3  |
| 20       | None                                                                                                                                   | 94                  | 3.00   | 2.00 | 4.00 | 94          | 9.6   | 93          | 6.5   | 93          | 22.6  |
| 21       | severe malnutrition                                                                                                                    | 105                 | 3.42   | 1.00 | 4.77 | 105         | 22.9  | 104         | 26.0  | 105         | 27.6  |
| 22       | None                                                                                                                                   | 67                  | 3.00   | 0.80 | 4.80 | 67          | 14.9  | 67          | 7.5   | 64          | 51.6  |
| 23       | None                                                                                                                                   | 911                 | 2.35   | 0.50 | 4.98 | 911         | 14.8  | 905         | 24.4  | 903         | 12.4  |
| 24       | None                                                                                                                                   | 400                 | 2.00   | 0.50 | 4.70 | 400         | 25.5  | 399         | 37.3  | 400         | 9.3   |
| 25       | severe malnutrition MUAC <110mm, or oedema                                                                                             | 3                   | 2.91   | 0.91 | 3.00 | 3           | 100.0 | 3           | 33.3  | 3           | 100.0 |
| 26       | None                                                                                                                                   | 389                 | 1.83   | 0.50 | 4.83 | 389         | 50.4  | 389         | 32.1  | 388         | 42.8  |
| 27       | None                                                                                                                                   | 25                  | 1.00   | 0.50 | 4.00 | 22          | 9.1   | 25          | 0.0   | 18          | 16.7  |
| 28       | None                                                                                                                                   | 251                 | 3.00   | 0.90 | 4.80 | 251         | 22.7  | 250         | 27.2  | 247         | 20.7  |
| 29       | weight-for-height below 70% of median NCHS/WHO reference and/or symmetrical oedemas involving at least the feet                        | 295                 | 3.06   | 0.71 | 5.00 | 295         | 12.5  | 294         | 32.7  | 295         | 2.7   |
| 30       | None                                                                                                                                   | 35                  | 3.29   | 0.67 | 4.83 | 35          | 22.9  | 34          | 32.4  | 34          | 2.9   |
| 31       | weight-for-height below 70% of median NCHS/WHO reference and/or symmetrical oedemas involving at least the feet                        | 32                  | 3.00   | 1.00 | 4.00 | 32          | 12.5  | 32          | 6.3   | 32          | 28.1  |
| 32       | growth standard is below -3 z-score, has symmetrical oedema involving at least the feet or has a mid-upper arm circumference < 110 mm) | 56                  | 3.28   | 1.00 | 4.96 | 56          | 7.1   | 55          | 3.6   | 55          | 20.0  |
| 33       | Malnutrition                                                                                                                           | 675                 | 2.91   | 0.25 | 4.91 | 675         | 13.6  | 671         | 25.0  | 672         | 7.7   |
| 34       | None                                                                                                                                   | 17                  | 4.00   | 1.00 | 4.00 | 17          | 23.5  | 17          | 35.3  | 17          | 17.6  |
| 35       | Malnutrition                                                                                                                           | 67                  | 3.08   | 1.08 | 4.91 | 67          | 26.9  | 66          | 33.3  | 66          | 13.6  |
| 36       | None                                                                                                                                   | 388                 | 2.33   | 0.41 | 4.91 | 388         | 18.6  | 377         | 44.0  | 384         | 7.8   |

| Study ID | Median (Range)  |             | Genotyping method                            | Number of patients with recurrence |     |           | Kaplan-Meier estimate (95% CI) at end FU |                 |
|----------|-----------------|-------------|----------------------------------------------|------------------------------------|-----|-----------|------------------------------------------|-----------------|
|          | Weight          | Height      |                                              | RC                                 | RI  | no PCR    | RC                                       | RI              |
| 1        | 14.3(10.2-16.5) | 97(76-105)  | MSP-1 and MSP-2                              | 0                                  | 0   | 0         | 1.00(-.)                                 | 1.00(-.)        |
| 2        | 14.5(11.0-28.0) | 93(69-112)  | MSP-1 and MSP-2                              | 1                                  | 0   | 0         | 0.97(0.79-1.00)                          | 1.00(-.)        |
| 3        | 13.1(6.3-20.1)  | 93(63-115)  | MSP-1 and MSP-2; CA1                         | 5                                  | 51  | 4 (6·1)   | 0.95(0.89-0.98)                          | 0.59(0.49-0.67) |
| 4        | 11.0(6.1-17.0)  | 84(64-105)  | MSP-1 and MSP-2, glurp                       | 6                                  | 32  | 3 (7·3)   | 0.97(0.94-0.99)                          | 0.86(0.81-0.90) |
| 5        | 9.7(5.0-18.0)   | 79(51-111)  | MSP-2                                        | 9                                  | 21  | 0         | 0.96(0.93-0.98)                          | 0.92(0.88-0.95) |
| 6        | 12.1(6.1-18.8)  | 88(48-117)  | MSP-1 and MSP-2, glurp                       | 1                                  | 7   | 1         | 0.99(0.90-1.00)                          | 0.91(0.82-0.95) |
| 7        | 14.0(10.0-20.0) | 94(72-112)  | MSP-1 and MSP-2                              | 1                                  | 1   | 0         | 0.99(0.93-1.00)                          | 0.99(0.93-1.00) |
| 8        | 13.0(8.0-18.2)  | 100(78-113) | MSP-1 and MSP-2                              | 0                                  | 0   | 0         | 1.00(-.)                                 | 1.00(-.)        |
| 9        | 13.0(7.2-22.0)  | 93(64-119)  | MSP-1 and MSP-2, glurp                       | 0                                  | 1   | 2         | 1.00(-.)                                 | 0.91(0.51-0.99) |
| 10       | 8.0(8.0-9.0)    | 79(70-81)   | MSP-1 and MSP-2                              | 0                                  | 0   | 0         | 1.00(-.)                                 | 1.00(-.)        |
| 11       | 8.0(5.2-13.5)   | 70(58-90)   | MSP-1 and MSP-2; four microsatellite markers | 0                                  | 32  | 1         | 1.00(-.)                                 | 0.88(0.83-0.91) |
| 12       | 13.4(6.0-22.0)  | 89(59-112)  | MSP-1 and MSP-2                              | 3                                  | 1   | 0         | 0.98(0.95-0.99)                          | 0.99(0.96-1.00) |
| 13       | 11.0(5.1-24.9)  | 84(54-122)  | MSP-1 and MSP-2, glurp                       | 86                                 | 457 | 62 (10·2) | 0.97(0.97-0.98)                          | 0.86(0.85-0.87) |
| 14       | 12.0(6.3-18.7)  | 88(69-105)  | MSP-1 and MSP-2                              | 0                                  | 10  | 3 (23·1)  | 1.00(-.)                                 | 0.89(0.81-0.94) |
| 15       | 12.0(7.0-16.0)  | 92(60-115)  | MSP-1 and MSP-2, glurp                       | 3                                  | 2   | 0         | 0.93(0.80-0.98)                          | 0.95(0.82-0.99) |
| 16       | 11.0(6.0-25.5)  | 83(53-117)  | MSP-1 and MSP-2, glurp                       | 70                                 | 230 | 30 (9·1)  | 0.95(0.94-0.96)                          | 0.84(0.82-0.85) |
| 17       | 12.0(6.6-18.0)  | 86(64-114)  | MSP-2                                        | 9                                  | 17  | 1         | 0.89(0.80-0.94)                          | 0.80(0.69-0.87) |
| 18       | 11.7(5.0-23.1)  | 83(43-123)  | MSP-1 and MSP-2, glurp                       | 15                                 | 24  | 1         | 0.98(0.96-0.98)                          | 0.96(0.94-0.97) |
| 19       | 11.5(6.5-16.5)  | 91(64-110)  | MSP-1 and MSP-2, glurp                       | 0                                  | 2   | 0         | 1.00(-.)                                 | 0.94(0.77-0.98) |
| 20       | 13.7(9.0-21.0)  | 99(73-113)  | MSP-1 MSP-2                                  | 0                                  | 1   | 3         | .(-.)                                    | .(-.)           |
| 21       | 13.0(9.0-18.0)  | 95(76-110)  | MSP-1 and MSP-2; CA1                         | 5                                  | 23  | 2         | 0.94(0.87-0.98)                          | 0.77(0.67-0.84) |
| 22       | 11.8(7.6-19.1)  | 96(70-122)  | MSP-1 MSP-2                                  | 0                                  | 3   | 6 (66·7)  | 1.00(-.)                                 | 0.95(0.84-0.98) |
| 23       | 11.2(5.2-23.0)  | 86(60-114)  | MSP-1 and MSP-2, glurp                       | 20                                 | 266 | 39 (12·0) | 0.97(0.95-0.98)                          | 0.66(0.63-0.70) |
| 24       | 10.0(6.0-18.0)  | 82(62-107)  | MSP-1 and MSP-2, glurp                       | 6                                  | 258 | 11 (4·0)  | 0.98(0.96-0.99)                          | 0.32(0.27-0.37) |
| 25       | 8.8(7.0-9.8)    | 84(72-93)   | MSP-1 and MSP-2, glurp                       | 0                                  | 0   | 0         | 1.00(-.)                                 | 1.00(-.)        |
| 26       | 8.8(5.0-17.6)   | 79(63-112)  | MSP-2; CA1and TA87                           | 4                                  | 94  | 1         | 0.99(0.97-1.00)                          | 0.75(0.70-0.79) |
| 27       | 10.2(5.5-28.0)  | 80(65-101)  | MSP-1 and MSP-2, glurp                       | 1                                  | 1   | 1         | 0.96(0.74-0.99)                          | 0.96(0.74-0.99) |
| 28       | 12.0(10.0-22.0) | 92(69-130)  | MSP-1 and MSP-2; CA1                         | 6                                  | 30  | 0         | 0.97(0.94-0.99)                          | 0.87(0.82-0.91) |
| 29       | 12.9(7.0-20.0)  | 91(67-115)  | MSP-1 and MSP-2, glurp                       | 9                                  | 109 | 8 (6·3)   | 0.96(0.92-0.98)                          | 0.61(0.55-0.66) |
| 30       | 12.0(7.0-19.0)  | 92(69-111)  | MSP-1 and MSP-2, glurp                       | 1                                  | 9   | 0         | 0.97(0.81-1.00)                          | 0.74(0.56-0.85) |
| 31       | 13.1(10.0-18.9) | 97(77-109)  | MSP-1 and MSP-2                              | 1                                  | 0   | 0         | 0.97(0.80-1.00)                          | 1.00(-.)        |
| 32       | 13.3(8.0-19.5)  | 98(73-140)  | MSP-1 and MSP-2, glurp                       | 0                                  | 11  | 2         | 1.00(-.)                                 | 0.78(0.64-0.87) |
| 33       | 12.0(5.3-20.1)  | 89(61-118)  | MSP-1 and MSP-2, glurp                       | 30                                 | 106 | 6 (4·2)   | 0.95(0.93-0.96)                          | 0.83(0.80-0.86) |
| 34       | 13.0(10.0-21.0) | 94(72-104)  | MSP-1 and MSP-2, glurp                       | 2                                  | 0   | 3         | 0.86(0.54-0.96)                          | 1.00(-.)        |
| 35       | 12.0(6.5-16.0)  | 91(37-107)  | MSP-1 MSP-2                                  | 1                                  | 2   | 2         | 0.98(0.87-1.00)                          | 0.96(0.87-0.99) |
| 36       | 11.0(6.0-20.0)  | 83(37-108)  | MSP-2                                        | 24                                 | 89  | 8 (6·6)   | 0.93(0.90-0.95)                          | 0.75(0.71-0.80) |

\* RC= Recrudescence RI = Reinfection, evaluated at the end of study follow-up (28 or 42 days)



**Supplementary Table 2: Summary of treatment administered**

Supplementary Table 2: Summary of treatment administered

| Treatment   | N [%]       | Artemisinin Derivative (AD) |                   |                               | Partner Drug (PD) |                     |                               |
|-------------|-------------|-----------------------------|-------------------|-------------------------------|-------------------|---------------------|-------------------------------|
|             |             | N with dose                 | Median [Range]    | Underdosed <sup>1</sup> N [%] | N with dose       | Median [Range]      | Underdosed <sup>2</sup> N [%] |
| AL          | 5015 [44·4] | 4887                        | 11·4 [1·4 -86·3]  | 74 [1·5]                      | 5012              | 68·6 [8·3 - 518·0]  | 1533 [30·6]                   |
| ASAQ - FDC  | 2321 [20·5] | 2321                        | 12·5 [2·2 - 33·3] | 9 [0·4]                       | 2321              | 33·8 [6·0 - 90·0]   | 23 [1·0]                      |
| ASAQ - nFDC | 583 [5·2]   | 583                         | 12·1 [7·1-21·3]   | 0 [0]                         | 583               | 30·0 [ 20·3 - 64·3] | 22 [3·8]                      |
| ASMQ        | 531 [4·7]   | 516                         | 11·5 [6·3 - 26·3] | 0 [0]                         | 516               | 24·8 [12·5 - 52·6]  | 2 [0·4]                       |
| DP          | 2851 [25·2] | 2850                        | 6·9 [1·7 - 19·8]  | 1609 [56·5]                   | 2850              | 55·2 [13·2-158·0]   | 1609 [56·5]                   |
| All ACTs    | 11301 [100] | 11157                       | NA                | 1692 [15·2]                   | 11282             | NA                  | 3189 [28·3]                   |

<sup>1</sup> Below minimum total dose defined based on WHO guidelines as <5mg/kg for AL, <7·5 mg/kg for DP and children<25kg and <6mg/kg for all other regimens

<sup>2</sup> Below minimum total dose defined based on WHO guidelines as < 29 mg/kg for lumefantrine, <22·5mg/kg for AQ, <15mg/kg for MQ, <48mg/kg for DP in patients weighing >=25kg and <60mg/kg for DP in patient weight <25kg

AL Artemether-lumefantrine; ASAQ Artesunate-Amodiaquine; ASMQ Artesunate-Mefloquine; DP Dihydroartemisinin-piperaquine; (n)FDC (non) Fixed Dose Combination; ACTs Artemisinin-based Combination Therapies

**Supplementary Table 3. Univariable analysis of parasite positivity on Day 2**

Supplementary Table 3. Univariable analysis of parasite positivity on Day 2: Logistic regression models with random intercept for study-site were fitted.

| Parameter                      | N included | N positive | % positive | OR (95% CI)         | P-value |
|--------------------------------|------------|------------|------------|---------------------|---------|
| ACT                            |            |            |            |                     |         |
| AL                             | 4791       | 472        | 9.9        | 1.23 (0.99 - 1.51)  | 0.060   |
| ASAQ - FDC                     | 2309       | 179        | 7.8        | 0.62 (0.48 - 0.80)  | <0.001  |
| ASAQ - nFDC                    | 581        | 57         | 9.8        | 1.42 (0.75 - 2.69)  | 0.288   |
| ASMQ                           | 525        | 30         | 5.7        | 0.96 (0.56 - 1.65)  | 0.889   |
| DP                             | 2842       | 284        | 10.0       | 1                   |         |
| Age (years)                    | 11048      | 1022       | 9.3        | 1.00 (0.94 - 1.06)  | 0.886   |
| Age group                      |            |            |            |                     |         |
| < 1 year                       | 1132       | 87         | 7.7        | 0.92 (0.68 - 1.24)  | 0.572   |
| 1 year                         | 2905       | 247        | 8.5        | 1.05 (0.84 - 1.32)  | 0.671   |
| 2 years                        | 2768       | 283        | 10.2       | 1.16 (0.93 - 1.44)  | 0.182   |
| 3 years                        | 2317       | 222        | 9.6        | 1.01 (0.80 - 1.27)  | 0.942   |
| 4 years                        | 1926       | 183        | 9.5        | 1                   |         |
| Sex:                           |            |            |            |                     |         |
| Male                           | 5738       | 536        | 9.2        | 1.10 (0.95 - 1.27)  | 0.195   |
| Female                         | 5310       | 486        | 9.3        | 1                   |         |
| Haemoglobin (g/dL)             | 10858      | 997        | 9.2        | 0.98 (0.93 - 1.02)  | 0.258   |
| Anaemia <sup>1</sup>           |            |            |            |                     |         |
| Severe                         | 844        | 94         | 11.1       | 1.30 (1.00 - 1.69)  | 0.048   |
| Moderate                       | 6190       | 552        | 8.9        | 1.00 (0.86 - 1.17)  | 0.993   |
| No anaemia                     | 3824       | 351        | 9.2        | 1                   |         |
| Temperature (°C)               | 10939      | 1020       | 9.3        | 1.30 (1.21 - 1.38)  | <0.001  |
| Fever <sup>2</sup>             |            |            |            |                     |         |
| Yes                            | 6991       | 762        | 10.9       | 1.53 (1.30 - 1.82)  | <0.001  |
| No                             | 4055       | 260        | 6.4        | 1                   |         |
| Log <sub>10</sub> parasitaemia | 11048      | 1022       | 9.3        | 2.26 (1.95 - 2.62)  | <0.001  |
| Hyperparasitaemia <sup>3</sup> |            |            |            |                     |         |
| Yes                            | 1596       | 255        | 16.0       | 2.24 (1.88 - 2.68)  | <0.001  |
| No                             | 9452       | 767        | 8.1        | 1                   |         |
| Presence of gametocytes        |            |            |            |                     |         |
| Yes                            | 980        | 43         | 4.4        | 0.71 (0.50 - 1.02)  | 0.065   |
| No                             | 7854       | 741        | 9.4        | 1                   |         |
| Region:                        |            |            |            |                     |         |
| Asia <sup>4</sup>              | 124        | 17         | 13.7       | 2.57 (0.63 - 10.51) | 0.188   |
| Central Africa                 | 1329       | 71         | 5.3        | 0.52 (0.16 - 1.73)  | 0.284   |
| Eastern Africa                 | 6108       | 613        | 10.0       | 0.71 (0.33 - 1.53)  | 0.381   |
| Western Africa                 | 3487       | 321        | 9.2        | 1                   |         |
| TIA <sup>5</sup>               |            |            |            |                     |         |
| Low                            | 4596       | 392        | 8.5        | 0.40 (0.24 - 0.66)  | <0.001  |
| Moderate                       | 2283       | 338        | 14.8       | 0.53 (0.35 - 0.81)  | 0.003   |
| High                           | 4169       | 292        | 7.0        | 1                   |         |
| Weight-for-age z-score (WAZ)   | 11042      | 1021       | 9.2        | 0.92 (0.86 - 0.98)  | 0.010   |
| Underweight <sup>6</sup>       |            |            |            |                     |         |
| WAZ<-1                         | 5453       | 466        | 8.6        | 1.09 (0.94 - 1.26)  | 0.262   |
| WAZ<-2                         | 2067       | 165        | 8.0        | 1.10 (0.91 - 1.34)  | 0.337   |

|                                 |        |       |      |      |                    |        |
|---------------------------------|--------|-------|------|------|--------------------|--------|
|                                 | WAZ<-3 | 516   | 35   | 6.8  | 1.00 (0.68 - 1.47) | 0.986  |
| Weight-for-height z-score (WHZ) |        | 10938 | 1009 | 9.2  | 0.90 (0.85 - 0.95) | <0.001 |
| Wasting <sup>6</sup>            | WHZ<-1 | 3337  | 277  | 8.3  | 1.19 (1.01 - 1.40) | 0.043  |
|                                 | WHZ<-2 | 1187  | 96   | 8.1  | 1.21 (0.94 - 1.55) | 0.135  |
|                                 | WHZ<-3 | 319   | 30   | 9.4  | 1.34 (0.88 - 2.06) | 0.174  |
| Height-for-age z-score (HAZ)    |        | 10919 | 1007 | 9.2  | 1.03 (0.98 - 1.08) | 0.288  |
| Stunting <sup>6</sup>           | HAZ<-1 | 6593  | 609  | 9.2  | 0.98 (0.84 - 1.14) | 0.798  |
|                                 | HAZ<-2 | 3483  | 332  | 9.5  | 0.98 (0.84 - 1.16) | 0.847  |
|                                 | HAZ<-3 | 1310  | 136  | 10.4 | 0.89 (0.71 - 1.11) | 0.291  |

<sup>1</sup>Severe anaemia defined as hb<7g/dL, moderate anaemia as hb between 7 and 10g/dL; <sup>2</sup> fever defined as temperature >37.5°C or history of fever; <sup>3</sup> defined as parasitaemia>10<sup>5</sup>/μL; <sup>4</sup> includes children from India, Lao PDR, Papua New Guinea and Thailand; <sup>5</sup>TIA=Transmission Intensity Areas; <sup>6</sup>Compared to the rest of the children, for example WHZ<-1 is compared to WHZ≥-1.

#### Supplementary Table 4. Univariable analysis of risk of recrudescence.

Supplementary Table 4. Univariable analysis of risk of recrudescence by day 42. Cox regression model with shared frailty for study-site was fitted.

| Parameter            | N included  | N positive | % positive | HR (95% CI) | P-value            |       |
|----------------------|-------------|------------|------------|-------------|--------------------|-------|
| ACT                  |             |            |            |             |                    |       |
|                      | AL          | 4911       | 148        | 3.0         | 1.38 (1.03 - 1.85) | 0.033 |
|                      | ASAQ - FDC  | 2283       | 43         | 1.9         | 0.86 (0.57 - 1.28) | 0.448 |
|                      | ASAQ - nFDC | 573        | 31         | 5.4         | 2.55 (1.45 - 4.49) | 0.001 |
|                      | ASMQ        | 506        | 11         | 2.2         | 0.90 (0.44 - 1.85) | 0.774 |
|                      | DP          | 2820       | 86         | 3.0         | 1                  |       |
| Age (years)          |             | 11093      | 319        | 2.9         | 0.95 (0.86 - 1.04) | 0.257 |
| Age group            | < 1 year    | 1154       | 27         | 2.3         | 1.15 (0.70 - 1.90) | 0.583 |
|                      | 1 year      | 2950       | 92         | 3.1         | 1.50 (1.02 - 2.21) | 0.038 |
|                      | 2 years     | 2761       | 100        | 3.6         | 1.74 (1.19 - 2.53) | 0.004 |
|                      | 3 years     | 2315       | 62         | 2.7         | 1.31 (0.87 - 2.00) | 0.191 |
|                      | 4 years     | 1913       | 38         | 2.0         | 1                  |       |
| Sex:                 | Male        | 5761       | 173        | 3.0         | 1.09 (0.87 - 1.36) | 0.456 |
|                      | Female      | 5332       | 146        | 2.7         | 1                  |       |
| Haemoglobin (g/dL)   |             | 10900      | 310        | 2.8         | 0.91 (0.85 - 0.98) | 0.011 |
| Anaemia <sup>1</sup> | Severe      | 858        | 40         | 4.7         | 1.72 (1.17-2.53)   | 0.006 |
|                      | Moderate    | 6229       | 181        | 2.9         | 1.18 (0.91 - 1.53) | 0.217 |
|                      | No anaemia  | 3813       | 89         | 1.3         | 1                  |       |
| Temperature (°C)     |             | 10977      | 317        | 2.9         | 0.97 (0.88 - 1.07) | 0.549 |
| Fever <sup>2</sup>   | Yes         | 7059       | 186        | 2.6         | 0.90 (0.71 - 1.14) | 0.373 |
|                      | No          | 4027       | 133        | 3.3         | 1                  |       |

|                                      |                   |       |     |     |                    |       |
|--------------------------------------|-------------------|-------|-----|-----|--------------------|-------|
| Log <sub>10</sub> Parasitaemia (/μL) |                   | 11093 | 319 | 2.9 | 1.31 (1.06 - 1.61) | 0.011 |
| Hyperparasitaemia <sup>3</sup>       | Yes               | 1575  | 52  | 3.3 | 1.23 (0.90 - 1.66) | 0.192 |
|                                      | No                | 9518  | 267 | 2.8 | 1                  |       |
| Presence of gametocytes              | Yes               | 971   | 43  | 4.4 | 1.34 (0.96 - 1.89) | 0.089 |
|                                      | No                | 7711  | 228 | 3.0 | 1                  |       |
| Region                               | Asia <sup>4</sup> | 128   | 3   | 2.3 | 0.80 (0.20 - 3.24) | 0.750 |
|                                      | Central Africa    | 1324  | 41  | 3.1 | 0.74 (0.35 - 1.56) | 0.431 |
|                                      | Eastern Africa    | 5997  | 164 | 2.7 | 0.99 (0.63 - 1.56) | 0.979 |
|                                      | Western Africa    | 3644  | 111 | 3.0 | 1                  |       |
| TIA <sup>5</sup>                     | Low               | 4538  | 108 | 2.4 | 0.68 (0.44 - 1.07) | 0.096 |
|                                      | Moderate          | 2260  | 80  | 3.5 | 1.37 (0.86 - 2.18) | 0.185 |
|                                      | High              | 4295  | 131 | 3.1 | 1                  |       |
| Weight-for-age z-score (WAZ)         |                   | 11087 | 318 | 2.9 | 0.94 (0.85 - 1.04) | 0.239 |
| Underweight <sup>6</sup>             | WAZ<-1            | 5528  | 168 | 3.0 | 1.06 (0.84 - 1.32) | 0.636 |
|                                      | WAZ<-2            | 2149  | 63  | 2.9 | 1.04 (0.78 - 1.38) | 0.784 |
|                                      | WAZ<-3            | 571   | 11  | 1.9 | 0.71 (0.39 - 1.31) | 0.279 |
| Weight-for-height z-score (WHZ)      |                   | 10982 | 314 | 2.9 | 0.93 (0.85 - 1.02) | 0.126 |
| Wasting <sup>6</sup>                 | WHZ<-1            | 3422  | 115 | 3.4 | 1.34 (1.05 - 1.70) | 0.018 |
|                                      | WHZ<-2            | 1256  | 34  | 2.7 | 1.03 (0.71 - 1.48) | 0.887 |
|                                      | WHZ<-3            | 377   | 6   | 1.6 | 0.69 (0.30 - 1.57) | 0.375 |
| Height-for-age z-score (HAZ)         |                   | 10965 | 315 | 2.9 | 1.00 (0.92 - 1.07) | 0.900 |
| Stunting <sup>6</sup>                | HAZ<-1            | 6639  | 204 | 3.0 | 1.12 (0.88 - 1.42) | 0.355 |
|                                      | HAZ<-2            | 3495  | 101 | 2.9 | 0.96 (0.75 - 1.22) | 0.706 |
|                                      | HAZ<-3            | 1296  | 36  | 2.8 | 0.91 (0.64 - 1.30) | 0.611 |

<sup>1</sup>Severe anaemia defined as hb<7g/dL, moderate anaemia as hb between 7 and 10g/dL; <sup>2</sup> fever defined as temperature >37.5°C or history of fever; <sup>3</sup>defined as parasitaemia >10<sup>5</sup>/μL; <sup>4</sup> includes children from India, Lao PDR, Papua New Guinea and Thailand; <sup>5</sup>TIA=Transmission Intensity Areas; <sup>6</sup>compared to the rest of the children, for example WHZ<-1 is compared to WHZ≥-1.

**Supplementary Table 5. Univariable analysis of risk of reinfection**

Supplementary Table 5. Univariable analysis of risk of reinfection by day 42. Cox regression model with shared frailty for study-site was fitted.

| Parameter                            | N included | N positive | % positive | HR (95% CI)        | P-value |
|--------------------------------------|------------|------------|------------|--------------------|---------|
| ACT                                  |            |            |            |                    |         |
| AL                                   | 4910       | 984        | 20.0       | 2.80 (2.39 - 3.29) | <0.001  |
| ASAQ - FDC                           | 2283       | 414        | 18.1       | 2.37 (1.97 - 2.86) | <0.001  |
| ASAQ - nFDC                          | 573        | 130        | 22.7       | 5.87 (3.88 - 8.90) | <0.001  |
| ASMQ                                 | 506        | 129        | 25.5       | 2.28 (1.72 - 3.02) | <0.001  |
| DP                                   | 2820       | 233        | 8.3        | 1                  |         |
| Age (years)                          | 11092      | 1890       | 17.0       | 1.05 (1.01 - 1.09) | 0.014   |
| Age group                            |            |            |            |                    |         |
| < 1 year                             | 1154       | 163        | 14.1       | 0.70 (0.57 - 0.85) | <0.001  |
| 1 year                               | 2950       | 542        | 18.4       | 0.90 (0.77 - 1.04) | 0.146   |
| 2 years                              | 2761       | 516        | 18.7       | 1.03 (0.89 - 1.19) | 0.710   |
| 3 years                              | 2314       | 376        | 16.2       | 0.98 (0.84 - 1.14) | 0.749   |
| 4 years                              | 1913       | 293        | 15.3       | 1                  |         |
| Sex:                                 |            |            |            |                    |         |
| Male                                 | 5761       | 1024       | 17.8       | 1.10 (1.01 - 1.21) | 0.033   |
| Female                               | 5331       | 866        | 16.2       | 1                  |         |
| Haemoglobin (g/dL)                   | 10899      | 1874       | 17.2       | 0.97 (0.94 - 1.00) | 0.038   |
| Anaemia <sup>1</sup>                 |            |            |            |                    |         |
| Severe                               | 858        | 186        | 21.7       | 1.19 (1.00-1.41)   | 0.045   |
| Moderate                             | 6228       | 1119       | 18.0       | 1.05 (0.949-1.17)  | 0.320   |
| No anaemia                           | 3813       | 569        | 14.9       | 1                  |         |
| Temperature (C°)                     | 10976      | 1885       | 17.2       | 1.01 (0.97 - 1.05) | 0.685   |
| Fever <sup>2</sup> :                 |            |            |            |                    |         |
| Yes                                  | 7058       | 1156       | 16.4       | 0.98 (0.89 - 1.09) | 0.710   |
| No                                   | 4027       | 730        | 18.1       | 1                  |         |
| Log <sub>10</sub> parasitaemia (/μL) | 11092      | 1890       | 17.0       | 1.20 (1.10 - 1.31) | <0.001  |
| Hyperparasitaemia <sup>3</sup>       |            |            |            |                    |         |
| Yes                                  | 1574       | 251        | 16.0       | 1.10 (0.96 - 1.26) | 0.187   |
| No                                   | 9518       | 1639       | 17.2       | 1                  |         |
| Presence of gametocytes.             |            |            |            |                    |         |
| Yes                                  | 971        | 235        | 24.2       | 1.18 (1.02 - 1.37) | 0.026   |
| No                                   | 7710       | 1330       | 17.3       | 1                  |         |
| Region:                              |            |            |            |                    |         |
| Asia <sup>4</sup>                    | 128        | 5          | 3.9        | 0.18 (0.05 - 0.68) | 0.012   |
| Central Africa                       | 1324       | 154        | 11.6       | 0.48 (0.22 - 1.01) | 0.053   |
| Eastern Africa                       | 5996       | 907        | 15.1       | 0.74 (0.46 - 1.17) | 0.192   |
| Western Africa                       | 3644       | 824        | 22.6       | 1                  |         |
| TIA <sup>5</sup>                     |            |            |            |                    |         |
| Low                                  | 4537       | 475        | 10.5       | 0.37 (0.24 - 0.56) | <0.001  |
| Moderate                             | 2260       | 315        | 13.9       | 0.76 (0.50 - 1.15) | 0.186   |
| High                                 | 4295       | 1100       | 25.6       | 1                  |         |

|                                 |        |       |      |      |                    |       |
|---------------------------------|--------|-------|------|------|--------------------|-------|
| Weight-for-age z-score (WAZ)    |        | 11086 | 1890 | 17.0 | 0.96 (0.92 - 1.00) | 0.054 |
| Underweight <sup>6</sup>        | WAZ<-1 | 5527  | 1067 | 19.3 | 1.13 (1.03 - 1.24) | 0.009 |
|                                 | WAZ<-2 | 2148  | 430  | 20.0 | 1.08 (0.97 - 1.21) | 0.176 |
|                                 | WAZ<-3 | 571   | 95   | 16.6 | 0.86 (0.69 - 1.06) | 0.147 |
| Weight-for-height z-score (WHZ) |        | 10981 | 1880 | 17.1 | 0.96 (0.92 - 1.00) | 0.027 |
| Wasting <sup>6</sup>            | WHZ<-1 | 3421  | 680  | 20.0 | 1.09 (0.99 - 1.21) | 0.083 |
|                                 | WHZ<-2 | 1256  | 278  | 22.1 | 1.26 (1.10 - 1.45) | 0.001 |
|                                 | WHZ<-3 | 377   | 75   | 19.9 | 1.09 (0.85 - 1.39) | 0.511 |
| Height-for-age z-score (HAZ)    |        | 10964 | 1880 | 17.1 | 1.00 (0.96 - 1.03) | 0.797 |
| Stunting <sup>6</sup>           | HAZ<-1 | 6638  | 1145 | 17.3 | 0.96 (0.88 - 1.06) | 0.442 |
|                                 | HAZ<-2 | 3494  | 603  | 17.3 | 1.03 (0.93 - 1.14) | 0.551 |
|                                 | HAZ<-3 | 1296  | 208  | 16.1 | 1.06 (0.91 - 1.23) | 0.444 |

<sup>1</sup>Severe anaemia defined as hb<7g/dL, moderate anaemia as hb between 7 and 10g/dL; <sup>2</sup> fever defined as temperature >37.5°C or history of fever; <sup>3</sup> defined as parasitaemia >10<sup>5</sup>/μL; <sup>4</sup> includes children from India, Lao PDR, Papua New Guinea and Thailand; <sup>5</sup>TIA=Transmission Intensity Areas; <sup>6</sup>Compared to the rest of the children, for example WHZ<-1 is compared to WHZ≥-1.

#### Supplementary Table 6. Prophylactic effect of treatment over 42 days of follow-up.

Supplementary Table 6. Prophylactic effect of treatment over 42 days of follow-up. Results come from multivariable Cox regression model with shared frailty for study site, and interaction terms with time intervals (0-21, 21-28, 28-42) for variables which proportional hazard assumption was not satisfied.

| Parameter                            | Time Interval (days) | AHR (95%CI) | p-value             |                    |        |
|--------------------------------------|----------------------|-------------|---------------------|--------------------|--------|
| Age group                            | <1 year              | 0.42        | 0.65 (0.53 - 0.79)  | <0.001             |        |
|                                      | 1 year               | 0.42        | 0.85 (0.73 - 0.99)  | 0.033              |        |
|                                      | 2 years              | 0.42        | 0.99 (0.85 - 1.15)  | 0.911              |        |
|                                      | 3 years              | 0.42        | 0.97 (0.828 - 1.13) | 0.674              |        |
|                                      | 4 years              | 0.42        | 1                   |                    |        |
| WHZ-score                            | 0-28                 |             | 1.08 (1.03-1.13)    | 0.001              |        |
|                                      | 28-42                |             | 0.94 (0.88-1.01)    | 0.081              |        |
| Log <sub>10</sub> parasitaemia (/μL) | 0-21                 |             | 1.52 (1.29 - 1.78)  | <0.001             |        |
|                                      | 21-42                |             | 1.11 (1.00 - 1.23)  | 0.059              |        |
| ACT                                  | AL                   | 0.42        | 1                   |                    |        |
|                                      | ASAQ-FDC             | 0.42        | 0.85 (0.74 - 0.97)  | 0.017              |        |
|                                      | ASAQ-nFDC            | 0-21        |                     | 2.80 (1.78 - 4.41) | <0.001 |
|                                      |                      | 21-42       |                     | 1.80 (1.19 - 2.72) | 0.005  |
|                                      | ASMQ                 | 0-21        |                     | 0.25 (0.13 - 0.46) | <0.001 |
| DP                                   | 21-42                |             | 1.07 (0.84 - 1.37)  | 0.578              |        |
|                                      | 0-21                 |             | 0.12 (0.08 - 0.19)  | <0.001             |        |
|                                      | 21-28                |             | 0.38 (0.30 - 0.48)  | <0.001             |        |
| Gender:                              | Male                 | 28-42       | 0.56 (0.44 - 0.71)  | <0.001             |        |
|                                      |                      | 0-42        | 1.10 (1.00 - 1.20)  | 0.049              |        |

|                       |          |      |                    |        |
|-----------------------|----------|------|--------------------|--------|
|                       | Female   | 0-42 | 1                  |        |
| TIA <sup>1</sup> :    | High     | 0-42 | 2·86 (1·85 - 4·43) | <0·001 |
|                       | Moderate | 0-42 | 2·01 (1·53 - 2·64) | <0·001 |
|                       | Low      | 0-42 | 1                  |        |
| Anemia <sup>2</sup> : | No       | 0-42 | 1                  |        |
|                       | Moderate | 0-42 | 1·09 (0·98 - 1·21) | 0·136  |
|                       | Severe   | 0-42 | 1·27 (1·07 - 1·52) | 0·007  |

<sup>1</sup>TIA=Transmission Intensity Areas; <sup>2</sup>Severe anaemia defined as hb<7g/dL, moderate anaemia as hb between 7 and 10g/dL.

## Supplementary Table 7. Risk of bias assessment

Supplementary Table 7. Risk of bias assessment. Part I. NI = No Information available n/a = not applicable

| Study ID | Pubmed ID                    | Sample size | N Arms | Randomisation | Concealment of Treatment | Sequence Generation      | Treatment Blinding   | Treatment Supervision           | PCR genotyping method                        |
|----------|------------------------------|-------------|--------|---------------|--------------------------|--------------------------|----------------------|---------------------------------|----------------------------------------------|
| 1        | 20361381; 17884832           | Yes         | 1      | No            | n/a                      | n/a                      | n/a                  | full                            | MSP-1 and MSP-2                              |
| 2        | 21740570                     | Yes         | 2      | Yes           | Opaque sealed envelopes  | computer generated       | open-label           | full                            | MSP-1 and MSP-2                              |
| 3        | 19128455                     | NI          | 3      | Yes           | NI                       | NI                       | patient blinded      | full                            | MSP-1 and MSP-2; CA1                         |
| 4        | 27599612                     | Yes         | 2      | Yes           | NI                       | NI                       | open-label           | full                            | MSP-1 and MSP-2, glurp                       |
| 5        | 15837358                     | Yes         | 1      | No            | n/a                      | n/a                      | n/a                  | full                            | MSP-2                                        |
| 6        | UNPUBLISHED                  | NI          | 2      | Yes           | NI                       | randomization list       | investigator blinded | full                            | MSP-1 and MSP-2, glurp                       |
| 7        | 20689585; 17519410; 19841149 | Yes         | 3      | Yes           | NI                       | NI                       | investigator blinded | partial (first daily dose only) | MSP-1 and MSP-2                              |
| 8        | 24354627                     | Yes         | 3      | Yes           | NI                       | NI                       | open-label           | full                            | MSP-1 and MSP-2                              |
| 9        | 22458860                     | Yes         | 2      | Yes           | Opaque sealed envelopes  | randomization list       | open-label           | full                            | MSP-1 and MSP-2, glurp                       |
| 10       | 19454000                     | NI          | 1      | No            | n/a                      | n/a                      | n/a                  | full                            | MSP-1 and MSP-2                              |
| 11       | 24825870; 19877969; 21383095 | No          | 2      | Yes           | NI                       | computer generated       | open-label           | Partial (first daily dose only) | MSP-1 and MSP-2; four microsatellite markers |
| 12       | 23270636                     | Yes         | 2      | Yes           | NI                       | NI                       | open-label           | full                            | MSP-1 and MSP-2                              |
| 13       | 22087077                     | Yes         | 4      | Yes           | Opaque sealed envelopes  | independent organisation | open-label           | full                            | MSP-1 and MSP-2, glurp                       |
| 14       | UNPUBLISHED                  | Yes         | 1      | No            | n/a                      | n/a                      | n/a                  | full                            | MSP-1 and MSP-2                              |
| 15       | 22824059                     | Yes         | 1      | No            | n/a                      | n/a                      | n/a                  | partial (first dose only)       | MSP-1 and MSP-2, glurp                       |
| 16       | 19936217                     | Yes         | 2      | Yes           | Opaque sealed envelopes  | independent organisation | open-label           | full                            | MSP-1 and MSP-2, glurp                       |
| 17       | 19187521                     | Yes         | 1      | No            | n/a                      | n/a                      | n/a                  | full                            | MSP-2                                        |
| 18       | 25108397                     | Yes         | 2      | No            | n/a                      | n/a                      | open-label           | full                            | MSP-1 and MSP-2, glurp                       |
| 19       | 16903879                     | NI          | 2      | Yes           | Opaque sealed envelopes  | NI                       | open-label           | full                            | MSP-1 and MSP-2, glurp                       |
| 20       | UNPUBLISHED                  | Yes         | 2      | Yes           | Opaque sealed envelopes  | computer generated       | open-label           | full                            | MSP-1 MSP-2                                  |
| 21       | UNPUBLISHED                  | NI          | 1      | No            | n/a                      | n/a                      | n/a                  | Partial (first daily dose only) | MSP-1 and MSP-2; CA1                         |
| 22       | 21838909                     | NI          | 2      | Yes           | NI                       | NI                       | open-label           | full                            | MSP-1 MSP-2                                  |



|    |          |     |   |     |                         |                    |                      |                                 |                        |
|----|----------|-----|---|-----|-------------------------|--------------------|----------------------|---------------------------------|------------------------|
| 23 | 27430374 | Yes | 2 | Yes | Opaque sealed envelopes | computer generated | laboratory blinded   | full                            | MSP-1 and MSP-2, glurp |
| 24 | 25436614 | Yes | 2 | Yes | Opaque sealed envelopes | computer generated | open-label           | full                            | MSP-1 and MSP-2, glurp |
| 25 | 17477865 | Yes | 2 | Yes | Without concealment     | NI                 | open-label           | full                            | MSP-1 and MSP-2, glurp |
| 26 | 27776521 | Yes | 1 | No  | n/a                     | n/a                | n/a                  | full                            | MSP-2; CA1 and TA87    |
| 27 | 33407454 | Yes | 1 | No  | n/a                     | n/a                | n/a                  | full                            | MSP-1 and MSP-2, glurp |
| 28 | 19505304 | Yes | 3 | Yes | NI                      | randomization list | investigator blinded | full                            | MSP-1 and MSP-2; CA1   |
| 29 | 23866774 | Yes | 2 | Yes | Opaque sealed envelopes | computer-generated | open-label           | full                            | MSP-1 and MSP-2, glurp |
| 30 | 25075834 | Yes | 4 | Yes | Opaque sealed envelopes | NI                 | open-label           | full                            | MSP-1 and MSP-2, glurp |
| 31 | 20065010 | Yes | 2 | Yes | NI                      | NI                 | open-label           | full                            | MSP-1 and MSP-2        |
| 32 | 25240962 | Yes | 1 | No  | n/a                     | n/a                | n/a                  | full                            | MSP-1 and MSP-2, glurp |
| 33 | 25001306 | Yes | 3 | Yes | Opaque sealed envelopes | computer generated | open-label           | full                            | MSP-1 and MSP-2, glurp |
| 34 | 27313266 | NI  | 1 | No  | n/a                     | n/a                | n/a                  | full                            | MSP-1 and MSP-2, glurp |
| 35 | 25549086 | Yes | 4 | Yes | Opaque sealed envelopes | computer generated | open-label           | partial (first daily dose only) | MSP-1 MSP-2            |
| 36 | 16163624 | Yes | 2 | Yes | NI                      | NI                 | open-label           | full                            | MSP-2                  |

Supplementary Table 7. Risk of bias assessment. Part II

| Study ID | Pubmed ID                    | % with missing data | %lost before Day 28 | % lost before Day 42 | N with RC | N with NI | N with no PCR | % Day2 missing | WFH invalid |
|----------|------------------------------|---------------------|---------------------|----------------------|-----------|-----------|---------------|----------------|-------------|
| 1        | 20361381; 17884832           | 0·0                 | 0·0                 |                      | 0         | 0         | 0             | 0·0            | 0·0         |
| 2        | 21740570                     | 0·0                 | 8·8                 |                      | 1         | 0         | 0             | 0·0            | 17·6        |
| 3        | 19128455                     | 0·0                 | 1·5                 |                      | 5         | 51        | 4 (6·1)       | 0·0            | 0·0         |
| 4        | 27599612                     | 9·1                 | 5·2                 | 6·4                  | 6         | 32        | 3 (7·3)       | 0·0            | 0·0         |
| 5        | 15837358                     | 0·4                 | 1·5                 |                      | 9         | 21        | 0             | 1·5            | 0·7         |
| 6        | UNPUBLISHED                  | 10·0                | 6·2                 |                      | 1         | 7         | 1             | 1·2            | 1·2         |
| 7        | 20689585; 17519410; 19841149 | 3·6                 | 7·5                 |                      | 1         | 1         | 0             | 1·9            | 0·0         |
| 8        | 24354627                     | 21·4                | 0·0                 | 18·2                 | 0         | 0         | 0             | 0·0            | 9·1         |
| 9        | 22458860                     | 0·0                 | 0·0                 |                      | 0         | 1         | 2             | 0·0            | 0·0         |
| 10       | 19454000                     | 81·3                | 0·0                 |                      | 0         | 0         | 0             | 0·0            | 0·0         |
| 11       | 24825870; 19877969; 21383095 | 6·9                 | 1·5                 |                      | 0         | 32        | 1             | 0·0            | 0·0         |
| 12       | 23270636                     | 21·2                | 0·0                 |                      | 3         | 1         | 0             | 0·5            | 1·0         |
| 13       | 22087077                     | 1·7                 | 4·6                 |                      | 86        | 457       | 62 (10·2)     | 0·4            | 0·3         |
| 14       | UNPUBLISHED                  | 0·0                 | 3·9                 |                      | 0         | 10        | 3 (23·1)      | 0·0            | 0·0         |
| 15       | 22824059                     | 7·8                 | 6·4                 | 8·5                  | 3         | 2         | 0             | 0·0            | 0·0         |
| 16       | 19936217                     | 0·6                 | 3·0                 | 4·4                  | 70        | 230       | 30 (9·1)      | 0·1            | 0·5         |
| 17       | 19187521                     | 0·0                 | 3·3                 |                      | 9         | 17        | 1             | 0·0            | 1·1         |
| 18       | 25108397                     | 3·2                 | 8·5                 |                      | 15        | 24        | 1             | 0·0            | 6·8         |
| 19       | 16903879                     | 22·0                | 0·0                 | 3·1                  | 0         | 2         | 0             | 15·6           | 3·1         |
| 20       | UNPUBLISHED                  | 6·0                 | 2·1                 |                      | 0         | 1         | 3             | 2·1            | 1·1         |
| 21       | UNPUBLISHED                  | 2·8                 | 2·9                 |                      | 5         | 23        | 2             | 0·0            | 0·0         |
| 22       | 21838909                     | 0·0                 | 1·5                 |                      | 0         | 3         | 6 (66·7)      | 0·0            | 4·5         |
| 23       | 27430374                     | 3·1                 | 5·6                 | 7·7                  | 20        | 266       | 39 (12·0)     | 0·0            | 0·9         |
| 24       | 25436614                     | 3·1                 | 0·8                 | 1·0                  | 6         | 258       | 11 (4·0)      | 0·0            | 0·0         |
| 25       | 17477865                     | 97·3                | 0·0                 |                      | 0         | 0         | 0             | 0·0            | 0·0         |
| 26       | 27776521                     | 2·0                 | 1·8                 | 3·3                  | 4         | 94        | 1             | 7·5            | 0·3         |
| 27       | 33407454                     | 30·6                | 4·0                 | 8·0                  | 1         | 1         | 1             | 4·0            | 28·0        |
| 28       | 19505304                     | 12·8                | 2·0                 |                      | 6         | 30        | 0             | 0·0            | 1·6         |
| 29       | 23866774                     | 0·3                 | 1·4                 | 2·7                  | 9         | 109       | 8 (6·3)       | 0·0            | 0·0         |
| 30       | 25075834                     | 0·0                 | 0·0                 |                      | 1         | 9         | 0             | 0·0            | 2·9         |
| 31       | 20065010                     | 68·6                | 0·0                 |                      | 1         | 0         | 0             | 0·0            | 0·0         |
| 32       | 25240962                     | 0·0                 | 7·1                 |                      | 0         | 11        | 2             | 3·6            | 1·8         |
| 33       | 25001306                     | 0·7                 | 3·7                 | 6·7                  | 30        | 106       | 6 (4·2)       | 0·1            | 0·4         |
| 34       | 27313266                     | 5·6                 | 23·5                | 23·5                 | 2         | 0         | 3             | 17·6           | 0·0         |
| 35       | 25549086                     | 10·7                | 6·0                 | 17·9                 | 1         | 2         | 2             | 0·0            | 1·5         |
| 36       | 16163624                     | 2·5                 | 1·0                 | 1·8                  | 24        | 89        | 8 (6·6)       | 0·5            | 1·0         |

### 3- Main Analysis Supplementary Figures

**Supplementary Figure 1. Distribution of children's weight and height in individual studies.**  
Number above each panel is the study id.

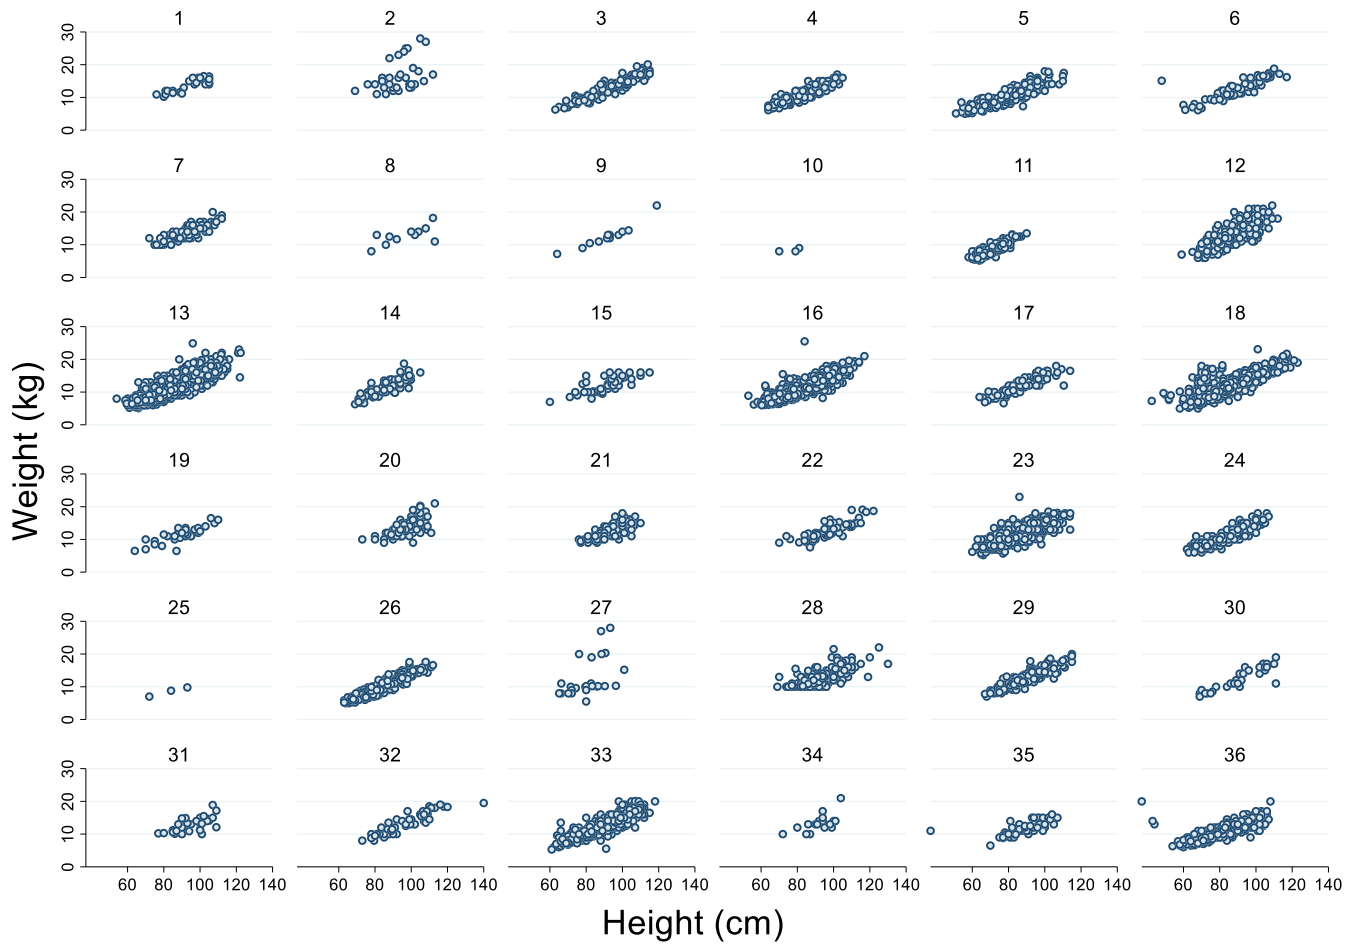

**Supplementary Figure 2. Forest plots of the association between a decrease in weight-for-height z-score and treatment outcomes in individual studies.**

Unadjusted estimates are presented due to small numbers. For studies omitted in the plots, data were too sparse so the model could not be fitted.

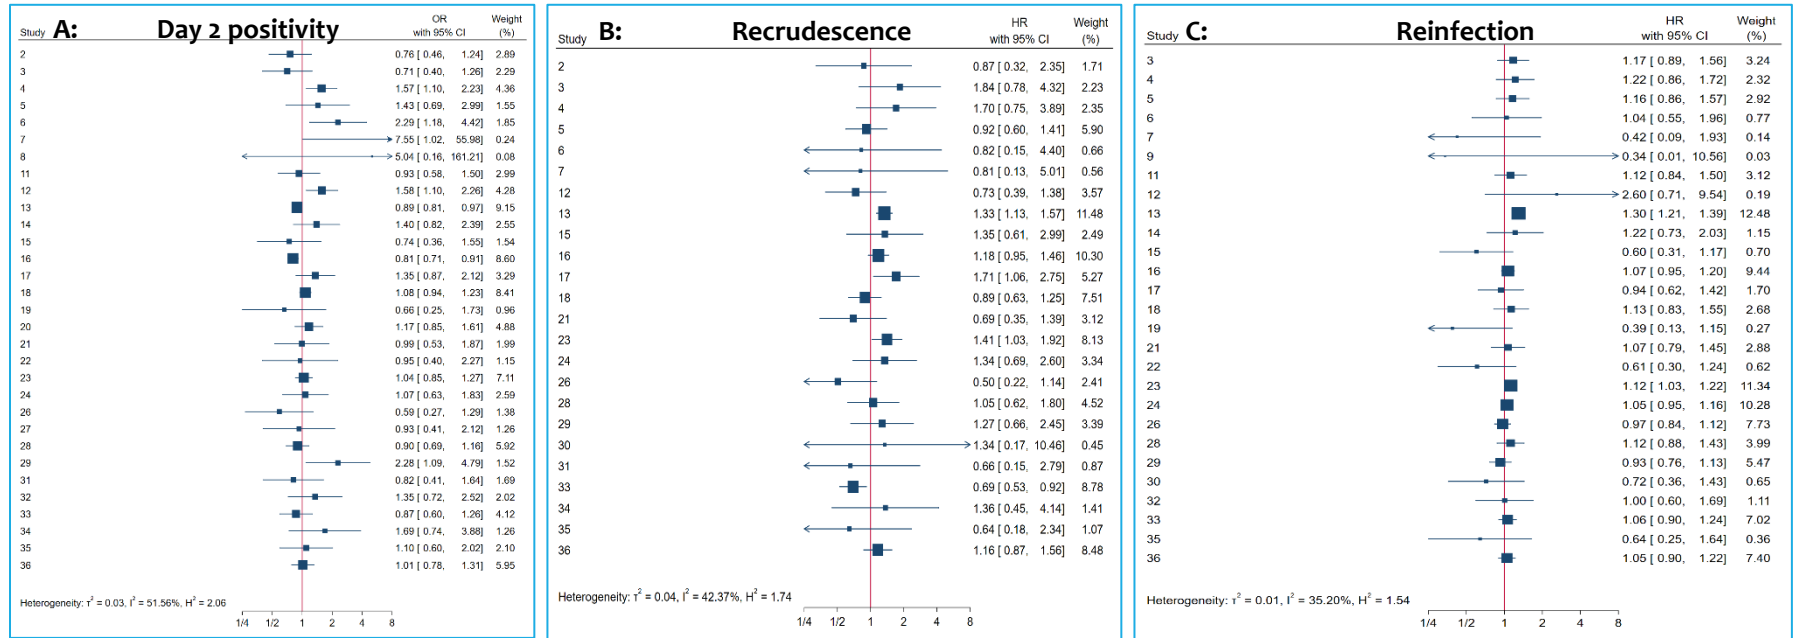

**Supplementary Figure 3. Forest plots of the association between a decrease in height-for-weight z-score and treatment outcomes in individual studies.**

Unadjusted estimates are presented due to small numbers. For studies omitted in the plots, data were too sparse so the model could not be fitted.

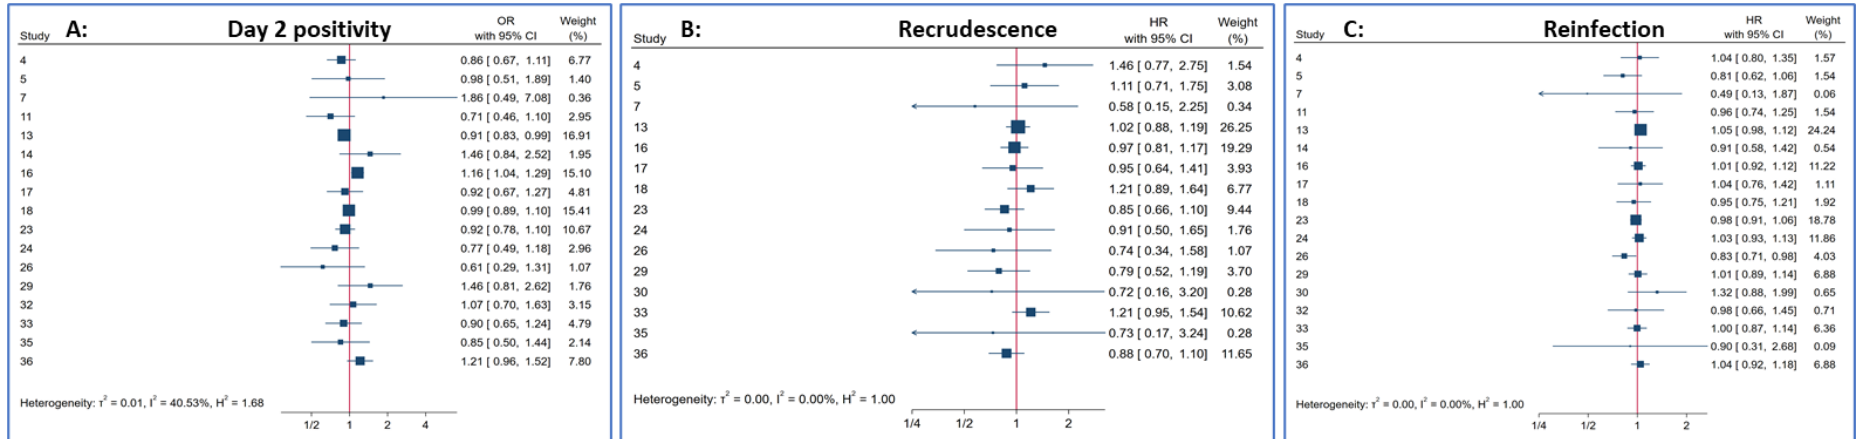

**Supplementary Figure 4. Map of study sites**

Supplementary Figure 4. Map of study sites

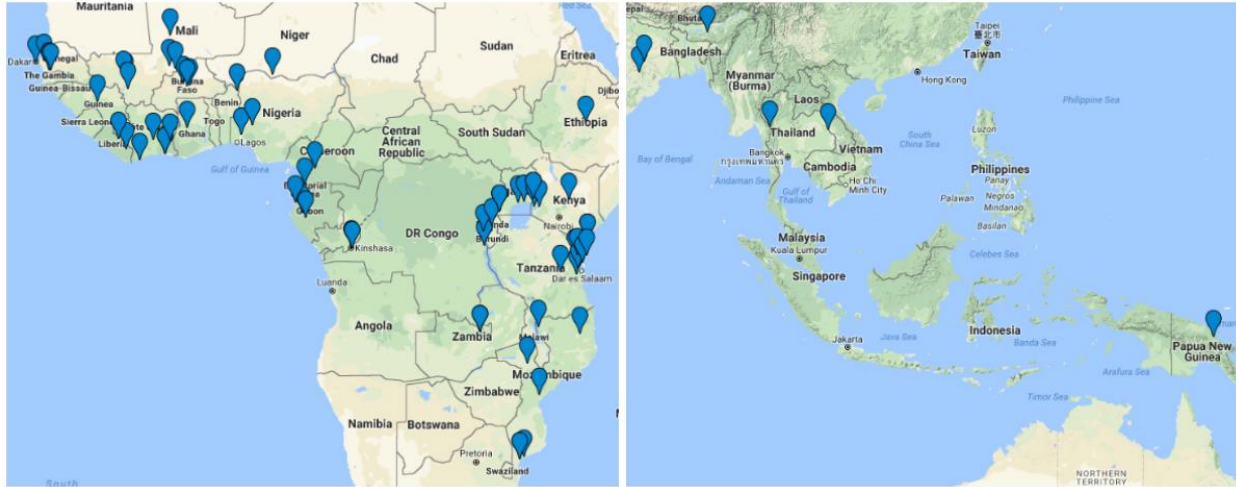

**Supplementary Figure 5. Venn diagram of anthropometric measures.**

Supplementary Figure 5. Venn diagram of anthropometric measures. % of total population are presented.

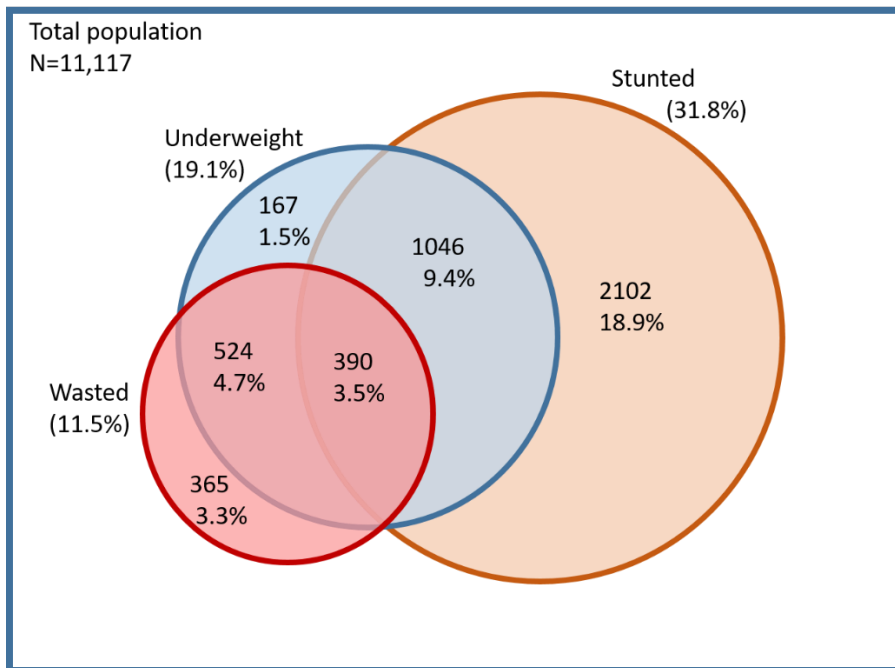

**Supplementary Figure 6. Total mg/kg dose by WHZ-score.**

Supplementary Figure 6. Total mg/kg dose by WHZ-score. Shown by different ACTs, separately for artemisinin component (left hand side panels) and for partner drugs (right hand side panels).

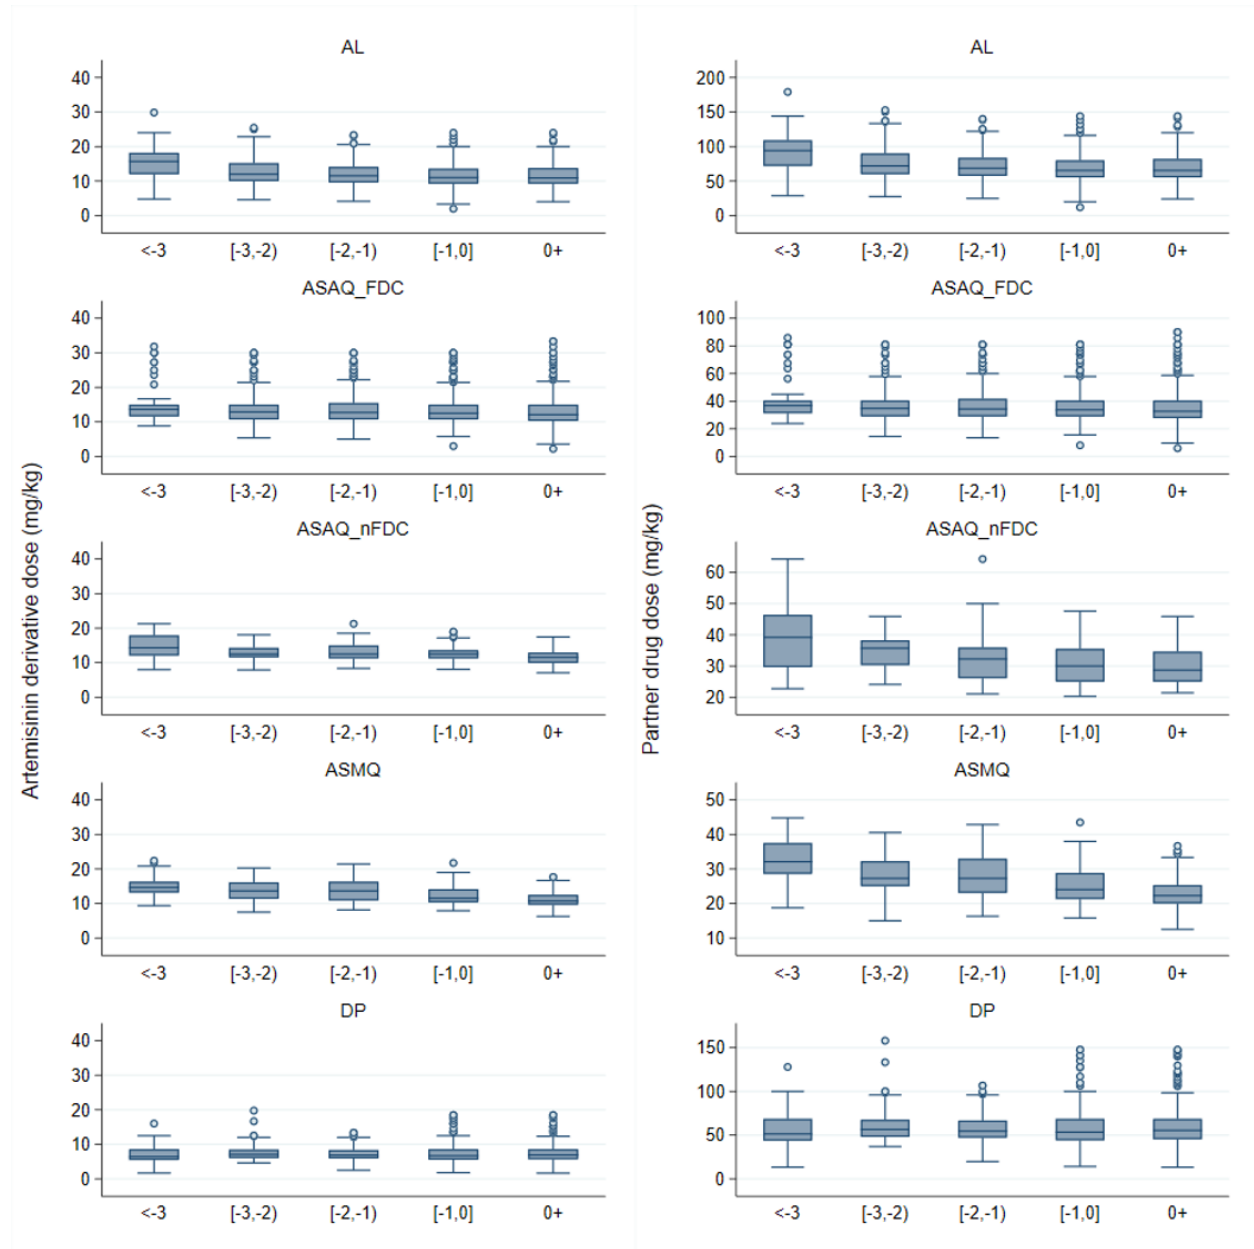

## 4. Sensitivity analysis

### 4-1. Assessment of study-specific data and influence of individual cohorts

Supplementary Figure 7. Sensitivity analysis: influence of individual cohorts on estimate of WHZ-score effect

Figures show estimates (and 95% CI) of the effect of weight-for-height z-score when the final multivariable model was refitted after exclusion of data from each study at a time. For comparison, estimates from the full model are also presented in red.

For recrudescence and reinfection, Day-42 models were fitted with interaction terms so separate effect sizes were estimated for intervals: 0-28 days, and 28-42 days (as it was done in the main analysis).

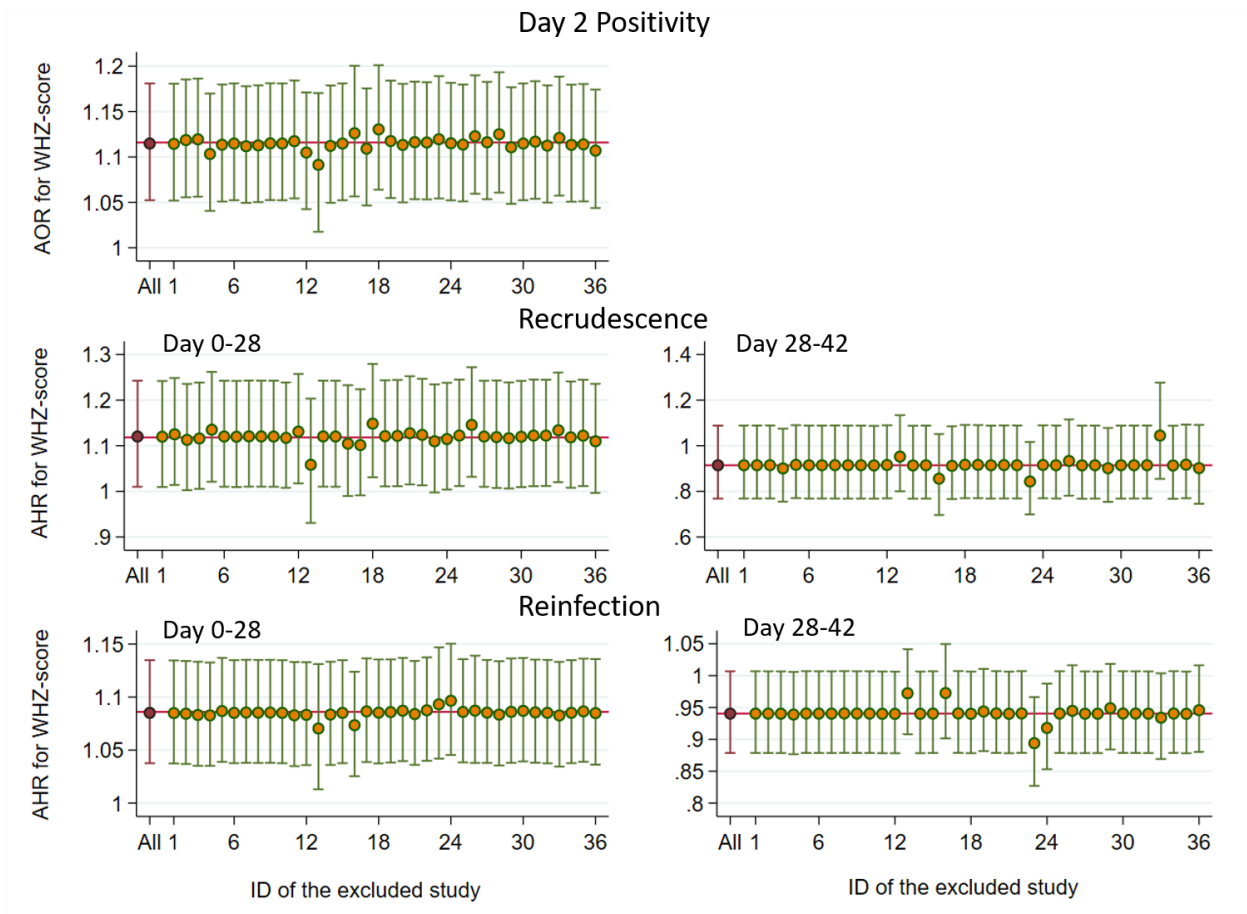



Supplementary Figure 8. Sensitivity analysis: influence of individual cohorts on estimate of HAZ-score effect

Figures show estimates (and 95% CI) of the effect of height-for-age z-score when the final multivariable model was refitted after exclusion of data from each study at a time. For comparison, estimates from the full model are also presented in red.

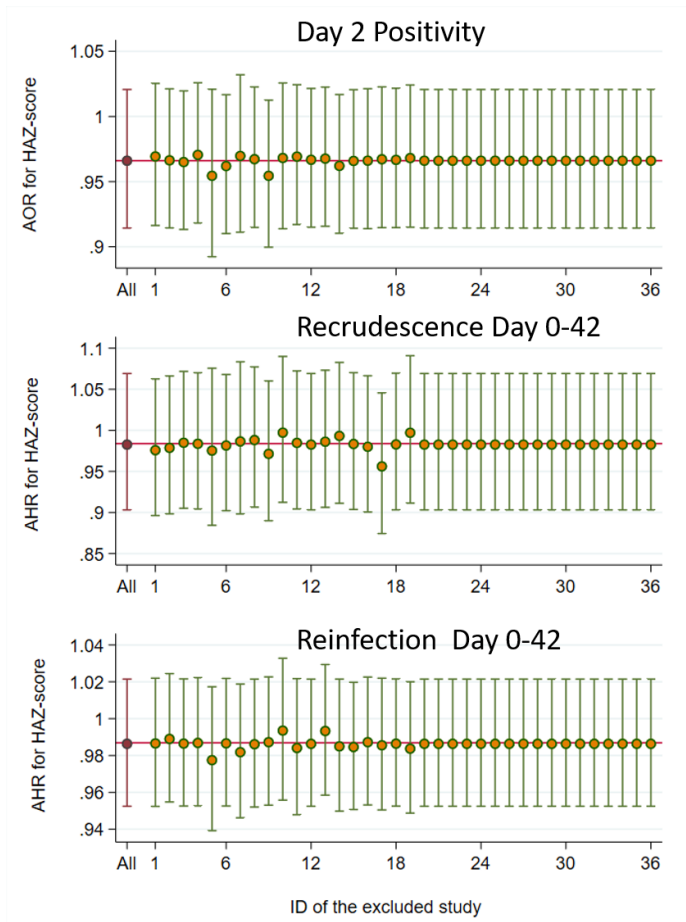

#### 4-2. Subgroup analysis restricted to studies using at least three molecular markers for identification of treatment outcomes

Supplementary Table 7. Independent predictors of treatment outcomes. Results from multivariable Cox regression models with random intercept for study-site, evaluated in 19 studies with 3 molecular markers or microsatellites used.

| Parameter                            | Recrudescence<br>n=9,361 |           |           | Reinfection<br>n=9,360 |           |           |        |
|--------------------------------------|--------------------------|-----------|-----------|------------------------|-----------|-----------|--------|
|                                      | AHR                      | 95%CI     | p-value   | AHR                    | 95%CI     | p-value   |        |
| Wasting WHZ-score <sup>1</sup>       | 1.14 <sup>3</sup>        | 1.01-1.28 | 0.033     | 1.09 <sup>4</sup>      | 1.04-1.14 | <0.001    |        |
| ACT                                  | AL <sup>2</sup>          | 1         |           | 1                      |           |           |        |
|                                      | ASAQ - FDC               | 0.64      | 0.44-0.94 | 0.024                  | 0.86      | 0.75-0.98 | 0.026  |
|                                      | ASAQ - nFDC              | 1.62      | 0.41-6.42 | 0.489                  | 1.62      | 0.48-5.49 | 0.437  |
|                                      | ASMQ                     | 0.75      | 0.37-1.50 | 0.412                  | 0.85      | 0.67-1.07 | 0.162  |
|                                      | DP                       | 0.71      | 0.52-0.96 | 0.025                  | 0.35      | 0.30-0.41 | <0.001 |
| Age group                            | <1 year                  | 0.90      | 0.50-1.63 | 0.725                  | 0.62      | 0.51-0.77 | <0.001 |
|                                      | 1 year                   | 1.41      | 0.91-2.16 | 0.121                  | 0.85      | 0.73-0.99 | 0.042  |
|                                      | 2 years                  | 1.59      | 1.04-2.43 | 0.033                  | 0.99      | 0.85-1.16 | 0.938  |
|                                      | 3 years                  | 1.28      | 0.81-2.01 | 0.284                  | 1.00      | 0.85-1.17 | 0.985  |
|                                      | 4 years                  | 1         |           |                        | 1         |           |        |
| Gender                               | Male                     |           |           | 1.09                   | 0.99-1.20 | 0.069     |        |
|                                      | Female                   |           |           | 1                      |           |           |        |
| TIA <sup>5</sup>                     | High                     | 1.17      | 0.67-2.04 | 0.575                  | 1.94      | 1.24-3.03 | 0.004  |
|                                      | Moderate                 | 0.90      | 0.55-1.46 | 0.661                  | 1.07      | 0.79-1.46 | 0.659  |
|                                      | Low                      | 1         |           |                        | 1         |           |        |
| Log <sub>10</sub> Parasitaemia (/μL) |                          | 1.31      | 1.03-1.66 | 0.026                  |           |           |        |
| Anaemia <sup>6</sup>                 | No                       | 1         |           |                        | 1         |           |        |
|                                      | Moderate                 | 1.11      | 0.83-1.48 | 0.483                  | 1.07      | 0.95-1.19 | 0.256  |
|                                      | Severe                   | 1.65      | 1.07-2.56 | 0.024                  | 1.22      | 1.02-1.47 | 0.032  |

<sup>1</sup>estimates shown for 1 unit decrease in weight-for-height z-score; <sup>2</sup>AHR is not constant across the follow-up time - for details see Supplementary table 6; <sup>3</sup>only in first 28 days of follow-up, AHR = 0.91 (0.75-1.10) p=0.320 between 28-42 days; <sup>4</sup>only in first 28 days of follow-up, AHR = 0.95 (0.88-1.02), p=0.131 between 28-42 days; <sup>5</sup>TIA=Transmission Intensity Areas; <sup>6</sup>severe anaemia defined as hb<7g/dL, moderate anaemia as hb between 7 and 10g/dL; <sup>7</sup>fever defined as temperature >37.5°C or history of fever.

For height-for-age z-score, no association was observed with risk of recrudescence (AHR=0.98, 95%CI 0.82-1.18, p=0.0863) or reinfection (AHR=1.02, 95%CI .96-1.09, p=0.467) in this restricted dataset.

### 4-3. Multiple imputations of age

Supplementary Table 8. Estimates for the effect of WHZ- and HAZ- scores on treatment outcomes estimated on age imputed dataset. All 36 studies were included for all analyses.

| Parameter                   | N(n) AOR (95% CI) P-value |                  |        |                            |                  |        |                          |                  |        |
|-----------------------------|---------------------------|------------------|--------|----------------------------|------------------|--------|--------------------------|------------------|--------|
|                             | Parasite positivity on D2 |                  |        | Recrudescence <sup>3</sup> |                  |        | Reinfection <sup>3</sup> |                  |        |
| <b>WASTING</b>              |                           |                  |        |                            |                  |        |                          |                  |        |
| WHZ (decrease) <sup>1</sup> | 10721 (981)               | 1.12 (1.05-1.18) | <0.001 | 10758 (305)                | 1.14 (1.02-1.26) | 0.016  | 10768 (1863)             | 1.09 (1.04-1.14) | <0.001 |
| Wasted (WHZ<-2)             |                           |                  |        |                            |                  |        |                          |                  |        |
| No                          | 9562 (890)                |                  |        | 9532 (272)                 |                  |        | 9537 (1586)              |                  |        |
| Yes                         | 1159 (91)                 | 1.15 (0.89-1.49) | 0.295  | 1226 (33)                  | 1.15 (0.77-1.74) | 0.493  | 1231 (277)               | 1.32 (1.14-1.54) | <0.001 |
| <b>WHZ</b>                  |                           |                  |        |                            |                  |        |                          |                  |        |
| ≥ 0                         | 4090 (397)                |                  |        | 4047 (95)                  |                  |        | 4049 (577)               |                  |        |
| ≥ -1 to 0                   | 3367 (316)                | 1.32 (1.10-1.58) | 0.003  | 3363 (97)                  | 1.27 (0.90-1.79) | 0.182  | 3365 (609)               | 1.05 (0.91-1.21) | 0.507  |
| ≥ -2 to -1                  | 2105 (177)                | 1.33 (1.08-1.65) | 0.009  | 2122 (80)                  | 1.85 (1.29-2.65) | <0.001 | 2123 (400)               | 1.15 (0.98-1.34) | 0.089  |
| ≥ -3 to -2                  | 847 (63)                  | 1.30 (0.95-1.80) | 0.105  | 857 (27)                   | 1.68 (1.02-2.75) | 0.041  | 861 (202)                | 1.42 (1.17-1.73) | <0.001 |
| < -3                        | 312 (28)                  | 1.51 (0.95-2.40) | 0.079  | 369 (6)                    | 1.08 (0.43-2.74) | 0.867  | 370 (75)                 | 1.33 (1.00-1.79) | 0.055  |
| <b>STUNTING</b>             |                           |                  |        |                            |                  |        |                          |                  |        |
| HAZ (decrease) <sup>2</sup> | 10692 (977)               | 0.98 (0.93-1.03) | 0.378  | 10730 (305)                | 0.99 (0.91-1.07) | 0.758  | 10741 (1861)             | 0.98 (0.95-1.02) | 0.343  |
| Stunted (HAZ<-2)            |                           |                  |        |                            |                  |        |                          |                  |        |
| No                          | 7167 (646)                |                  |        | 7196 (205)                 |                  |        | 7202 (1254)              |                  |        |
| Yes                         | 3525 (331)                | 0.98 (0.83-1.16) | 0.848  | 3534 (100)                 | 0.91 (0.71-1.17) | 0.472  | 3539 (607)               | 0.98 (0.89-1.09) | 0.753  |
| <b>HAZ</b>                  |                           |                  |        |                            |                  |        |                          |                  |        |
| ≥ 0                         | 1649 (156)                |                  |        | 1647 (41)                  |                  |        | 1648 (278)               |                  |        |
| ≥ -1 to 0                   | 2420 (212)                | 0.97 (0.75-1.25) | 0.823  | 2423 (63)                  | 1.02 (0.70-1.49) | 0.926  | 2424 (439)               | 0.99 (0.85-1.15) | 0.900  |
| ≥ -2 to -1                  | 3098 (278)                | 0.94 (0.74-1.20) | 0.603  | 3126 (101)                 | 1.17 (0.82-1.67) | 0.378  | 3130 (537)               | 0.88 (0.76-1.02) | 0.097  |
| ≥ -3 to -2                  | 2184 (192)                | 0.97 (0.74-1.27) | 0.819  | 2212 (62)                  | 0.99 (0.67-1.46) | 0.946  | 2213 (394)               | 0.93 (0.79-1.09) | 0.378  |
| < -3                        | 1341 (139)                | 0.83 (0.62-1.13) | 0.233  | 1322 (38)                  | 0.95 (0.60-1.50) | 0.825  | 1326 (213)               | 0.94 (0.78-1.13) | 0.493  |

<sup>1</sup>Estimates shown for 1 unit decrease in weight-for-height z-score (WHZ); <sup>2</sup>Estimates shown for 1 unit decrease in height-for-age z-score (HAZ); <sup>3</sup> For WHZ estimate for 28 days follow-up is shown; N= number of evaluated children; n = number with outcome.

## 5: Supplementary References

1. WorldWide Antimalarial Resistance Network. Clinical Module: Data Management and Statistical Analysis Plan Version 1.2. 2012 [Available from: <http://www.wwarn.org/sites/default/files/ClinicalDMSAP.pdf>].
2. Gething PW, Patil AP, Smith DL, Guerra CA, Elyazar IR, Johnston GL, et al. A new world malaria map: Plasmodium falciparum endemicity in 2010. *Malaria journal*. 2011;10:378.
3. World Health Organization. Malaria surveillance, monitoring & evaluation: a reference manual 2018 [Available from: <https://apps.who.int/iris/bitstream/handle/10665/272284/9789241565578-eng.pdf>].
4. de Onis M, Garza C, Victora CG, Onyango AW, Frongillo EA, Martines J. The WHO Multicentre Growth Reference Study: planning, study design, and methodology. *Food and nutrition bulletin*. 2004;25(1 Suppl):S15-26.
5. WHO Multicentre Growth Reference Study Group. WHO Child Growth Standards: Length/height-for-age, weight-for-age, weight-for-length, weight-for-height and body mass index-for-age: Methods and development. Geneva World Health Organization. 2006:312.
6. Lee SJ, Stepniewska K, Anstey N, Ashley E, Barnes K, Binh TQ, et al. The relationship between the haemoglobin concentration and the haematocrit in Plasmodium falciparum malaria. *Malaria journal*. 2008;7:149.
7. Collett D. *Modelling Survival Data in Medical Research*. 3rd ed: CRC Press; 2015.
8. Royston P, Altman DG. Regression using fractional polynomials of continuous covariates: parsimonious parametric modelling. *Applied Statistics*. 1994;43:429-67.
9. Royston P. Multiple imputation of missing values: Further update of ice, with an emphasis on interval censoring. *Stata Journal*. 2007;7:445-64.
10. Rubin D. *Multiple Imputations for Nonresponse in Surveys*: New York: Wiley; 1987.

## 6: Members of WWARN ACT Malaria and Malnutrition Study Group

### Writing Committee:

**Kasia Stepniewska**, WorldWide Antimalarial Resistance Network, Oxford, UK and Centre for Tropical Medicine and Global Health, Nuffield Department of Medicine, University of Oxford, UK; **Sheila Isanaka**, Harvard T.H. Chan School of Public Health, Boston, US; **Karen I Barnes**, WorldWide Antimalarial Resistance Network, Oxford, UK and University of Cape Town, Cape Town, South Africa; **Philippe J Guerin**, WorldWide Antimalarial Resistance Network, Oxford, UK and Centre for Tropical Medicine and Global Health, Nuffield Department of Medicine, University of Oxford, UK

### Members of WWARN ACT Malaria and Malnutrition Study Group:

**Richard Allan**, The MENTOR Initiative, Haywards Heath, West Sussex, UK; **Anupkumar R Anvikar**, National Institute of Malaria Research, New Delhi, India; **Thomas A Anyorigiya**, Navrongo Health Research Centre, Navrongo, Ghana and C. K. Tedam University of Technology and Applied Sciences, Navrongo, Ghana; **Elizabeth A**

**Ashley**, Centre for Tropical Medicine and Global Health, Nuffield Department of Medicine, University of Oxford and Lao-Oxford-Mahosot Hospital-Wellcome Trust Research Unit, Microbiology Laboratory, Mahosot Hospital, Vientiane, Laos; **Quique Bassat**, ISGlobal, Hospital Clinic - Universitat de Barcelona, Barcelona, Spain and Centro de Investigação em Saúde de Manhiça (CISM), Maputo, Mozambique and ICREA, Barcelona, Spain; **Elisabeth Baudin**, Epicentre, Paris; **Anders Bjorkman**, Department of Global Public Health, Karolinska Institute, Stockholm, Sweden; **Maryline Bonnet**, Université de Montpellier/TransVIHMI/IRD/INSERM, Montpellier, France and Epicentre, Mbarara, Uganda; **Caroline Boulton**, Novartis; **Teun Bousema**, Department of Infection and Immunity, London School of Hygiene and Tropical Medicine, London, UK and Department of Medical Microbiology, Radboud University Nijmegen Medical Centre, Nijmegen, the Netherlands; **Gwenaëlle Carn**, Drugs for Neglected Diseases Initiative, Geneva, Switzerland; **Verena I Carrara**, Shoklo Malaria Research Unit, Mahidol-Oxford Tropical Medicine Research Unit, Faculty of Tropical Medicine, Mahidol University, Mae Sot, Thailand and Mahidol Oxford Research Unit, Faculty of Tropical Medicine, Mahidol University, Bangkok, Thailand and Institute of Global Health, Faculty of Medicine, University of Geneva, Geneva, Switzerland; **Umberto D'Alessandro**, MRC Unit The Gambia at the London School of Hygiene and Tropical Medicine, London, UK; **Timothy ME Davis**, Medical School, University of Western Australia, Fremantle Hospital, Fremantle, Western Australia, Australia; **Lise Denoëud-Ndam**, Epicentre, Paris, France and Research Department, Elizabeth Glaser Pediatric AIDS Foundation, Geneva, Switzerland; **Meghna Desai**, U.S. CDC, Center for Global Health, Division of Global Health Protection, New Delhi, India; **Abdoulaye A Djimde**, Malaria Research and Training Center, Faculty of Pharmacy, University of Science, Techniques and Technologies of Bamako, Bamako, Mali; **Grant Dorsey**, Department of Medicine, University of California San Francisco, San Francisco, CA, USA; **Jean-François Etard**, Epicentre, Paris and TransVIHMI, Institut de Recherche pour le Développement, Université de Montpellier, INSERM, Montpellier, France; **Catherine Falade**, Institute for Advanced Medical Research and Training (IMRAT), College of Medicine, University of Ibadan, Ibadan, Nigeria; **Caterina Fanello**, Centre for Tropical Medicine and Global Health, Nuffield Department of Medicine, University of Oxford and Mahidol Oxford Research Unit, Faculty of Tropical Medicine, Mahidol University, Bangkok, Thailand; **Oumar Gaye**, Department of Medical Parasitology, Medical Faculty, Université Cheikh Anta Diop, Dakar, Senegal; **Raquel Gonzalez**, Centro de Investigação em Saude de Manhiça, Manhiça, Mozambique and Barcelona Institute for Global Health (ISGlobal), Hospital Clínic- Universitat de Barcelona, Spain; **Francesco Grandesso**, Epicentre, Paris, France; **Anastasia D Grivoyannis**, University of Washington, Seattle, WA, USA and Johns Hopkins

University School of Medicine, Baltimore, MD, USA; **Rebecca F Grais**, Epicentre, Paris, France; **Georgina S Humphreys**, WorldWide Antimalarial Resistance Network, Oxford, UK; **Deus S Ishengoma**, National Institute for Medical Research (NIMR), Dar es Salaam, Tanzania; **Corine Karema**, Quality and Equity Healthcare, Kigali, Rwanda and Swiss Tropical & Public Health Institute, Basel, Switzerland; **Kassoum Kayentao**, Malaria Research and Training Centre, Department of Epidemiology of Parasitologic Diseases, Faculty of Medicine, Pharmacy and Dentistry, University of Bamako, Mali; **Kalynn Kennon**, WorldWide Antimalarial Resistance Network, Oxford, UK and Centre for Tropical Medicine and Global Health, Nuffield Department of Medicine, University of Oxford, UK; **Peter G Kremsner**, Centre de Recherches Médicales de Lambaréné, Lambaréné, Gabon and Institute for Tropical Medicine, Universität Tübingen, Tübingen, Germany; **Moses Laman**, Papua New Guinea Institute of Medical Research, Goroka, Papua New Guinea and School of Medicine and Pharmacology, University of Western Australia, Fremantle Hospital, Fremantle, Western Australia, Australia; **Ibrahim M Laminou**, Centre de Recherche Médicale et Sanitaire, Niamey, Niger; **Eusebio Macete**, Centro de Investigação em Saúde de Manhiça (CISM), Maputo, Mozambique and Instituto Nacional de Saúde (INS), Maputo, Mozambique; **Andreas Martensson**, Department of Women's and Children's Health, Global health & Migration, Uppsala University, Uppsala, Sweden; **Mayfong Mayxay**, Lao-Oxford-Mahosot Hospital, Wellcome Trust Research Unit (LOMWRU), Microbiology Laboratory, Mahosot Hospital, Vientiane, Lao PDR and Institute of Research and Education Development, UHS, Ministry of Health, Vientiane, Lao PDR and Centre for Tropical Medicine and Global Health, Nuffield Department of Clinical Medicine, University of Oxford, Oxford, UK; **Hervé IB Menan**, Department of Parasitology, Faculty of Pharmacy, University of Cocody, Abidjan, Côte d'Ivoire; **Clara Menéndez**, Barcelona Institute for Global Health (ISGlobal) Hospital Clinic, University of Barcelona, Spain and CISM - Manhiça Health Research Center, Manhiça, Mozambique; **Brioni R Moore**, Curtin Medical School, Curtin University, Australia and School of Medicine and Pharmacology, The University of Western Australia, Crawley, Australia and Wesfarmers Centre of Vaccines & Infectious Diseases, Telethon Kids Institute, Australia; **Carolyn Nabasumba**, Epicentre, Paris, France and Faculty of Medicine, Mbarara University of Science and Technology, Mbarara, Uganda; **Jean-Louis Ndiaye**, Parasitology and Mycology Department, Research and Training Unit in Health Sciences, Université Iba Der Thiam, Thies, Senegal; **Abel Nhama**, Centro de Investigação Em Saúde de Manhiça (CISM), Maputo, Mozambique and Instituto Nacional de Saúde (INS), Maputo, Mozambique; **Francois Nosten**, Shoklo Malaria Research Unit, Mahidol-Oxford Tropical Medicine Research Unit, Faculty of Tropical Medicine, Mahidol University, Mae Sot, Thailand and Centre for Tropical

Medicine and Global Health, Nuffield Department of Medicine, University of Oxford, Oxford, UK; **Marie Onyamboko**, Faculty of Tropical Medicine, Mahidol University, Bangkok, Thailand and Kinshasa School of Public Health, University of Kinshasa, Kinshasa, Democratic Republic of the Congo; **Aung Pyae Phyo**, Shoklo Malaria Research Unit, Mahidol-Oxford Tropical Medicine Research Unit, Faculty of Tropical Medicine, Mahidol University, Mae Sot, Thailand and Centre for Tropical Medicine and Global Health, Nuffield Department of Medicine, University of Oxford, United Kingdom; **Michael Ramharter**, Department of Tropical Medicine Bernhard Nocht Institute for Tropical Medicine and I. Dep. of Medicine, University Medical Center Hamburg-Eppendorf; **Philip J Rosenthal**, Department of Medicine, University of California San Francisco, San Francisco, CA, USA; **Birgit Schramm**, Epicentre, Paris, France; **Yagya D Sharma**, Department of Biotechnology, All India Institute of Medical Sciences, New Delhi, India; **Sodiomon B Sirima**, Centre National de Recherche et de Formation sur le Paludisme (CNRFP), Ouagadougou, Burkina Faso; **Nathalie Strub-Wourgaft**, Drugs for Neglected Diseases Initiative, Geneva, Switzerland; **Khadime Sylla**, Service de Parasitologie-Mycologie Médicale, Université Cheikh Anta Diop, Dakar, Senegal; **Ambrose O Talisuna**, University of Oxford/KEMRI/Wellcome Trust Research Programme, Nairobi, Kenya; **Emmanuel A Temu**, The MENTOR Initiative, Haywards Heath, West Sussex, UK and Swiss Tropical and Public Health Institute, Basel, Switzerland and RBM Partnership to end Malaria, Geneva, Switzerland; **Julie I Thwing**, CDC Division of Parasitic Diseases and Malaria, CDC, Atlanta, GA, USA; **Halidou Tinto**, Institut de Recherche en Sciences de la Santé (IRSS), Nanoro, Burkina Faso and Centre Muraz, Bobo-Dioulasso, Burkina Faso; **Giovanni Valentini**, Alfasigma (formerly Sigma-tau); **Nicholas J White**, Mahidol Oxford Research Unit, Bangkok, Thailand and Centre for Tropical Medicine and Global Health, Nuffield Department of Medicine, University of Oxford, Oxford, UK; **Adoke Yeka**, Uganda Malaria Surveillance Project, Kampala, Uganda and Ministry of Health, Kampala, Uganda
